# Supplementary material for: Mobile phone data reveal the effects of violence on internal displacement in Afghanistan
Source: PubMed Central journal article supplement (PMC9130096; doi:10.1038/s41562-022-01336-4), 2022-05-12
Supplement: 41562_2022_1336_MOESM1_ESM.pdf [file 41562_2022_1336_MOESM1_ESM.pdf]

**Supplementary information**

---

**Mobile phone data reveal the effects of violence on internal displacement in Afghanistan**

---

In the format provided by the authors and unedited

# Supplementary Material for “Mobile Phone Data Reveal the Effects of Violence on Internal Displacement in Afghanistan”

Xiao Hui Tai<sup>a</sup>, Shikhar Mehra<sup>a</sup>, and Joshua E. Blumenstock<sup>a,\*</sup>

<sup>a</sup>School of Information, University of California, Berkeley, CA 94720, USA

\*Corresponding author: [jblumenstock@berkeley.edu](mailto:jblumenstock@berkeley.edu)

This version of text:

March 4, 2022

## 1 Data Processing

2 We have access to anonymized mobile phone metadata from Afghanistan’s largest mobile phone  
3 operator, during the period April 2013 to March 2017. We use metadata from call and internet  
4 access records. Each record contains a hash for the subscriber, the date and time, as well as cell  
5 tower the individual connected to. We have the geocoordinates of each cell tower. We group towers  
6 within 100 meters of each other into the same group, resulting in 1439 cell tower groups.

7 For each subscriber, we first determine the “hourly modal tower,” which we define to be the  
8 most frequently used cell tower group in each hour in which data are available for that subscriber.  
9 Then for each 24-hour period from 6 A.M. to 6 A.M. the next day, we select the modal tower group  
10 based on hourly modal towers. We define this to be the “daily modal tower” of that subscriber  
11 on that day. We then map the daily modal tower to the district based on the location of tower,  
12 obtaining a “daily modal location” for each subscriber. This will be available for each subscriber on  
13 days in which they have at least one transaction (call or data use).

14 Next, we use daily modal locations to estimate each subscriber’s residence or home loca-  
15 tion. To reiterate, daily locations may be sparse if subscribers do not use their phones ev-  
16 ery day, and might not accurately reflect a subscriber’s residence; for example it might encode  
17 weekend trips. We use an open-source Python package, `migration_detector` [1], available at  
18 [https://github.com/g-chi/migration\\_detector](https://github.com/g-chi/migration_detector), to infer a longer-term residence. More details  
19 of the algorithm are available in the accompanying documentation and paper. Briefly, segments in  
20 time with contiguous locations are grouped to identify persistent changes in locations. The algo-  
21 rithm incorporates tuning parameters, which we select such that the resulting location segments  
22 roughly correspond to a subscriber being in a district for at least a week-long period. Specifi-  
23 cally, we set `num_stayed_days_migrant`, `num_days_missing_gap`, `small_seg_len`, `seg_prop`,  
24 `min_overlap_part_len` to 5, 2, 7, 0.5 and 0 respectively.

25 We aggregate these individual home locations, inferred from `migration_detector`, to a district  
26 level, to derive the statistics used in the paper. These include the number of people per district per  
27 day, the number of people moving each day between pairs of districts, and so forth.

## 28 References

- 29 [1] Chi, G., Lin, F., Chi, G. & Blumenstock, J. A general approach to detecting migration events  
30 in digital trace data. *PloS one* **15**, e0239408 (2020).
- 31 [2] Sundberg, R. & Melander, E. Introducing the ucdp georeferenced event dataset.  
32 *Journal of Peace Research* **50**, 523–532 (2013).

33 [3] Çakıt, E. & Karwowski, W. Fuzzy inference modeling with the help of fuzzy clus-  
34 tering for predicting the occurrence of adverse events in an active theater of war.  
35 Applied Artificial Intelligence **29**, 945–961 (2015).

<sup>36</sup> **Supplementary Figures**

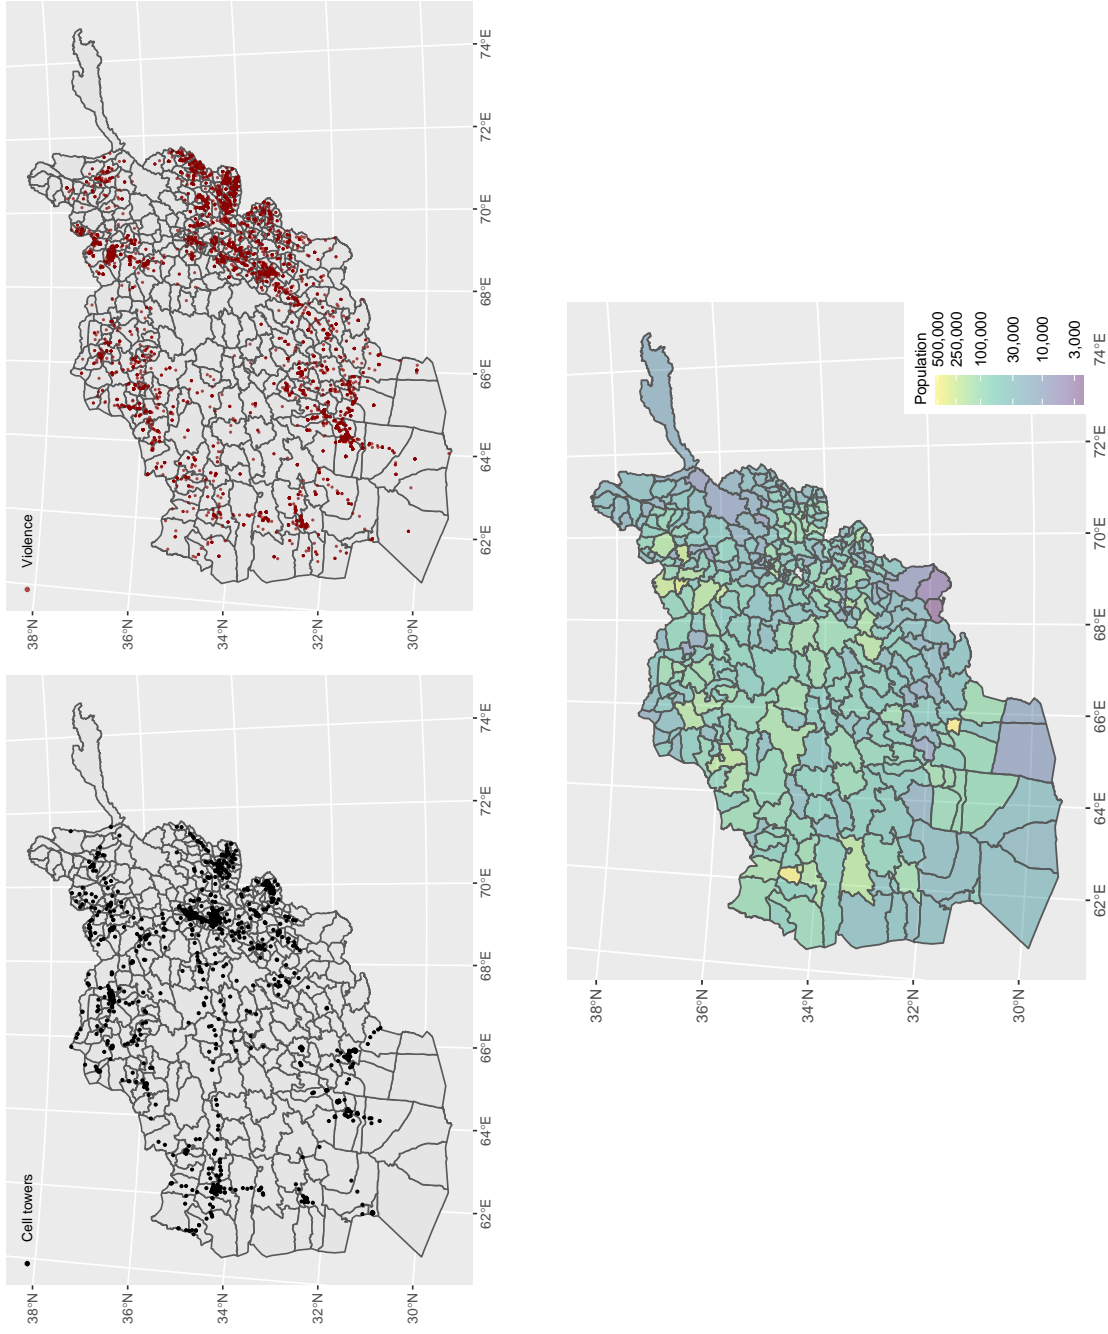

Supplementary Figure 1: Map of cell towers and violent events in Afghanistan, 2013-2017, and district-level population, 2015-2016. District boundaries are represented by black and gray lines. There are 1439 cell tower groups (black dots) and 5984 violent events (red dots) [2]. Event locations are marked by exact geocoordinates when available, or with the district centroid when only the district name is known. Population data is as of 2015-2016, available at <https://data.humdata.org/dataset/estimated-population-of-afghanistan-2015-2016>. Kabul is not colored as it distorts the scale; its recorded population is 3.7 million.

Supplementary Figure 2: Comparison of International Organization for Migration (IOM)-based estimates of displacement (official data) and Call Detail Records (CDR)-based estimates of migration (mobile phone data). IOM data uses the counts of recorded “fled IDPs (internally displaced persons)” for 2016 (outgoing IDPs;  $N = 1209125$ ), and the number of “returnee” and “arrival” IDPs (incoming IDPs;  $N = 2143281$ ). Blue bars represent each province’s share of the total number of (A) outgoing and (B) incoming IDPs. Red bars represent province shares of outgoing and incoming migrants, computed using CDR. CDR migrants are those who have different recorded locations at the beginning and the end of three four-month periods in 2016 (Jan-Apr, Apr-Aug, and Aug-Dec; summed to obtain a measure of movement in 2016). The number of CDR migrants is scaled using district population as estimated by Afghanistan’s Central Statistical Office, to get a district estimate of number of migrants (after scaling,  $N = 5632789$  for outgoing migrants, and  $N = 5654994$  for incoming migrants). Province shares are then computed in the same way as for official data. Kabul district is not included in the figure as it distorts the y-scale of the axes.

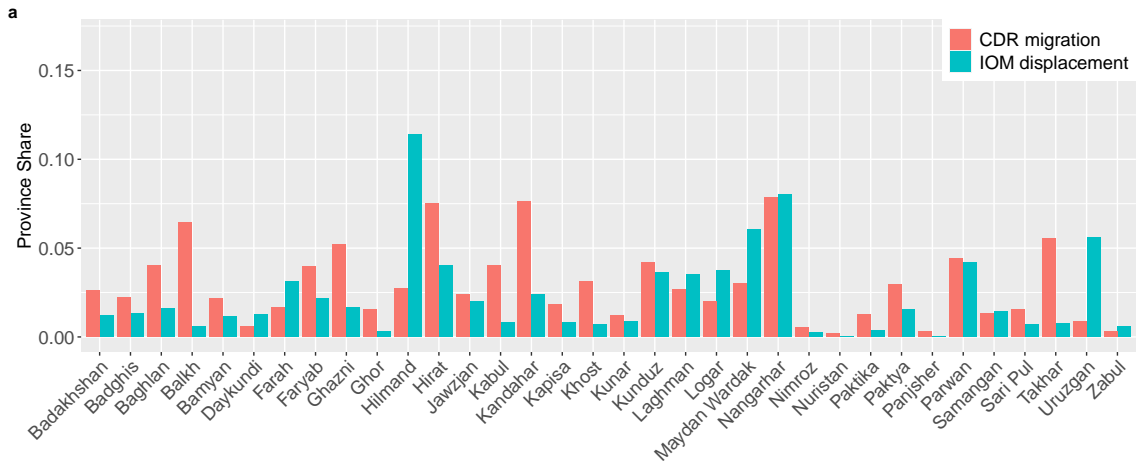

(a) Province shares of total outgoing individuals, by origin province.

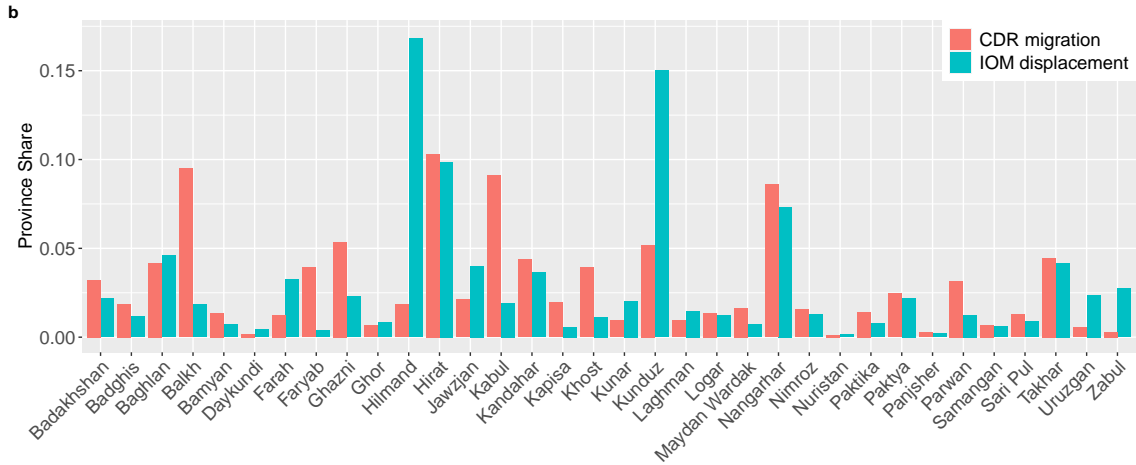

(b) Province shares of total incoming individuals, by destination province.

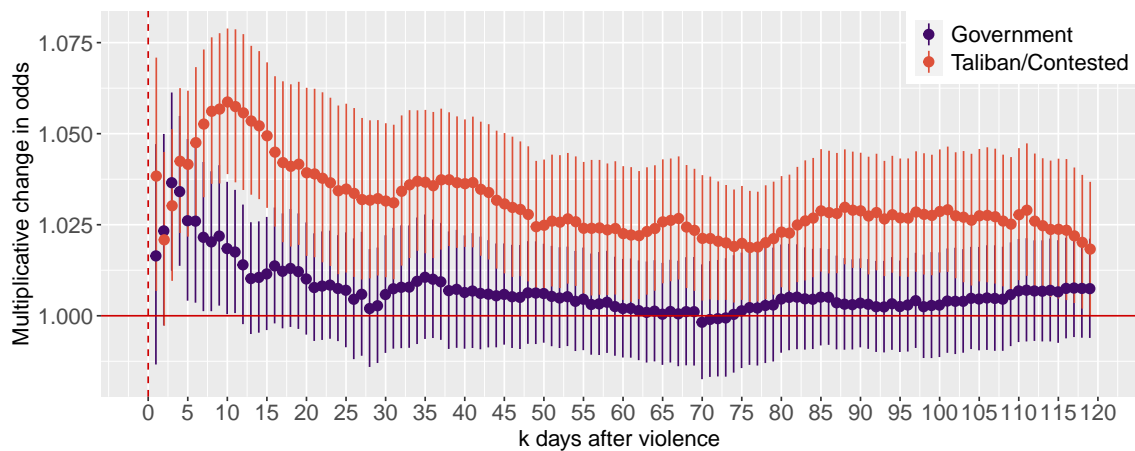

Supplementary Figure 3: Figure shows the effect of violence on internal displacement for events in districts under government control or influence ( $N=1469$ ) vs. events in districts that are contested or under insurgent control or influence ( $N=1885$ ). Territorial control is as of October 2017, assessed by the Special Inspector General for Afghanistan Reconstruction, and available at [https://www.sigar.mil/pdf/quarterlyreports/Addendum\\_2018-01-30qr.pdf](https://www.sigar.mil/pdf/quarterlyreports/Addendum_2018-01-30qr.pdf). By this measure, 221 districts are classified as government controlled or influenced, with the remaining 177 contested or under insurgent control or influence. Bars indicate 95% confidence intervals.



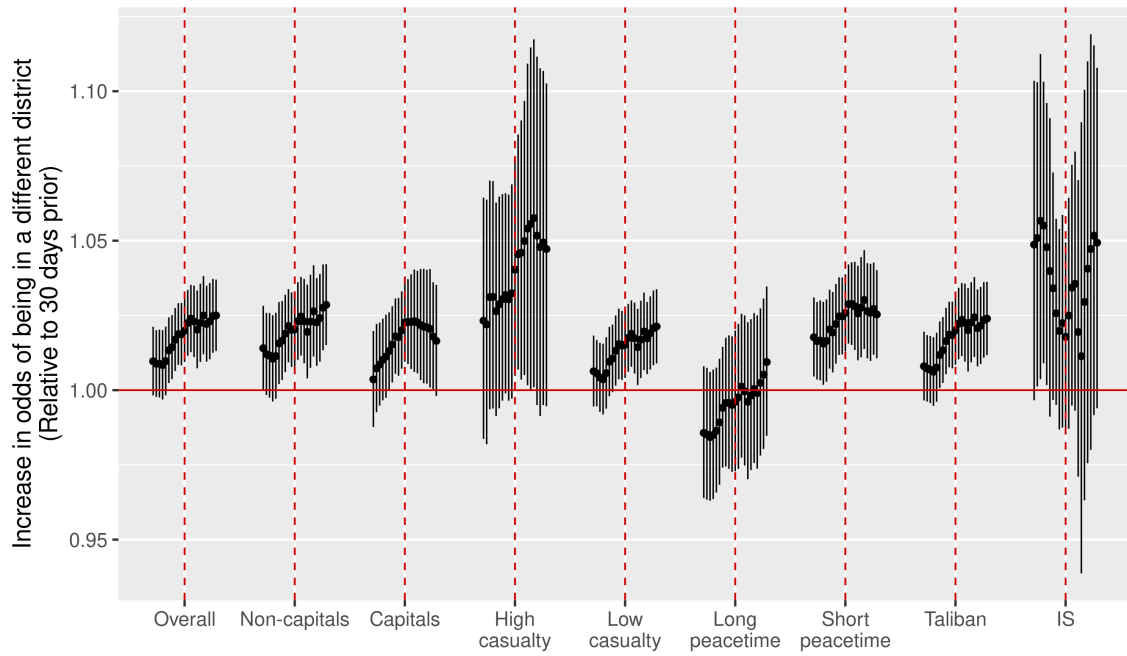

Supplementary Figure 4: Heterogeneous anticipatory effects for different types of violence and affected districts. 30-day displacement results are plotted, for coefficients representing violence happening 10 days prior to 10 days in the future. The dashed red vertical lines represent violence happening on the current day; coefficients to the left correspond to days preceding violence, indicating an anticipatory effect. Exponentiated regression coefficients indicate the increase in the odds that individuals are in a different district than they were 30 days prior. Bars indicate 95% confidence intervals. Estimates are based on 3354 events (overall), 2460 in non-capitals, 894 in non-capitals, 397 high casualty, 2957 low casualty, 1035 long peacetime, 2319 short peacetime, 3134 Taliban and 185 IS.

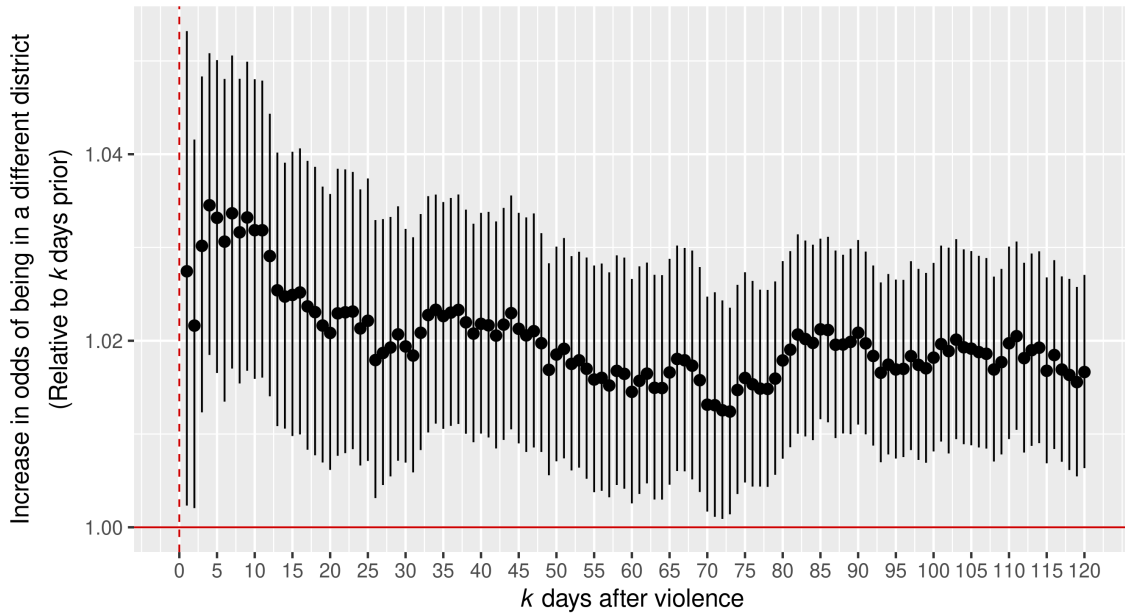

Supplementary Figure 5: Robustness of main results to data restrictions. Figure shows the effect of violence on internal displacement, for those present on the day of the violent event, with analysis restricted to a subset of the data. Specifically, we remove the following observations: (1) Kabul (2) first 60 days and last 90 days of study period (3) days with no “daily modal subscribers” (4) districts with “daily modal subscribers” recorded in fewer than 1095 days (3 years). These restrictions address several potential issues with the data, such as those that might relate to service outages and extreme values. We remove Kabul to investigate if its unique position as the country’s capital and most populous district unduly influences results. We find that all qualitative results hold, with only slight changes to the estimated coefficients. Bars indicate 95% confidence intervals. Estimates are based on 2762 violent events.

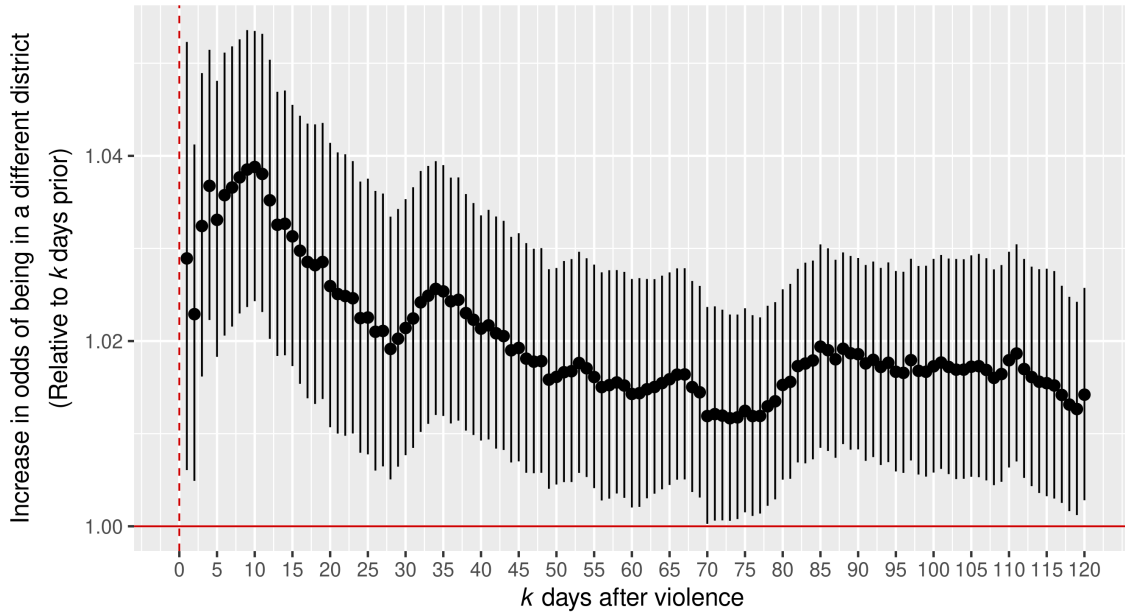

Supplementary Figure 6: Robustness of main results to the addition of time-varying regional control variables. Figure shows the effect of violence on internal displacement, including time-varying controls. Specifically, we include `region*month` as a control, where regions are as described in [3]. This specification helps address the possibility that certain regions might have higher than expected violence and displacement in certain months (for instance, if the fighting season of a region coincided with the regular departure of migrant workers). Results are qualitatively unchanged from our main specification. Bars indicate 95% confidence intervals. Estimates are based on 3354 violent events.

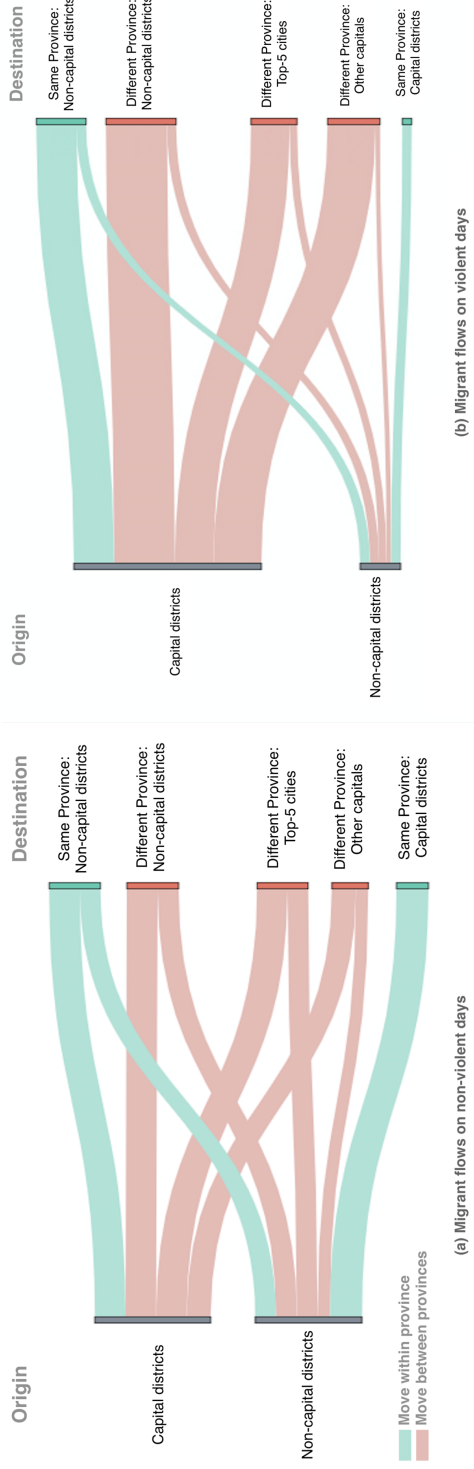

Supplementary Figure 7: Migrant flows on days (a) without violence and (b) with violence. Diagram indicates the proportion of individuals moving between locations of different types, where a move is defined as a change of home district over a 30-day period. For days in which violence occurred (b), the number of individuals moving from capital districts is much larger than from non-capital districts, since capital districts, particularly Kabul, both experience more violent days and have larger population sizes.

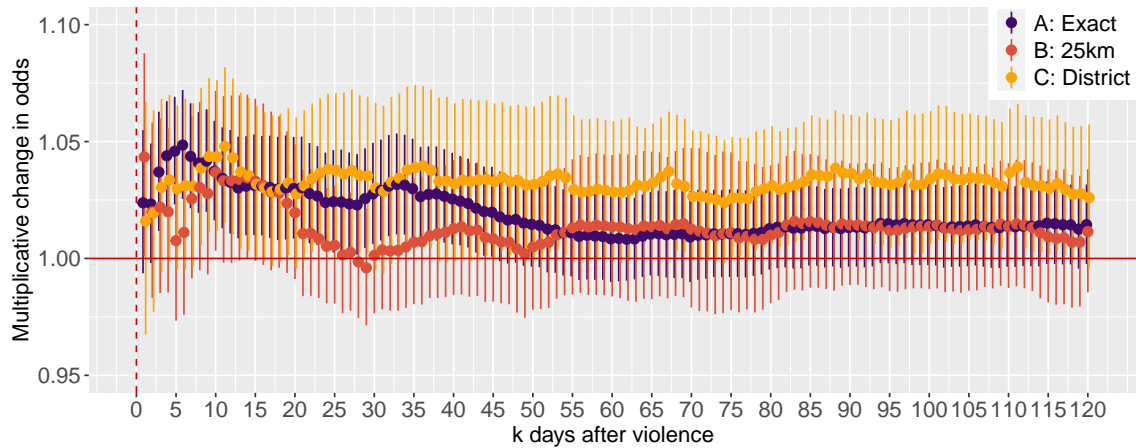

Supplementary Figure 8: Potential implications of missing violence data. Figure shows the effect of violence on internal displacement, separately for violent events recorded with three different levels of spatial resolutions: (A) Events in which the exact location of the event is known and coded ( $N=1698$ ), (B) Events which occurred within a 25 km radius around a known point ( $N=789$ ) and (C) Events in which only the district is known ( $N=969$ ). There are differences in the point estimates, but the confidence intervals of the estimated coefficients for the three types of events overlap. The magnitudes and overall conclusions that we draw in our main analysis are not substantively changed by analyzing these separate groups of events. Bars indicate 95% confidence intervals.

37 **Supplementary Tables**

Supplementary Table 1: Can violence be predicted?

|                                                             | (1)        | (2)       | (3)      | (4)      | (5)      |
|-------------------------------------------------------------|------------|-----------|----------|----------|----------|
| <i>Panel A: Model performance</i>                           |            |           |          |          |          |
| Linear model $R^2$                                          | 0.000031   | 0.000029  | 0.00024  | 0.00022  | 0.00028  |
| Random forest $R^2$                                         | 0.00000014 | 0.0000099 | 0.000081 | 0.000020 | 0.000019 |
| <i>Panel B: Variables used to predict residual violence</i> |            |           |          |          |          |
| Lags of migration (lags 1-15)                               | X          |           |          |          | X        |
| Trends of migration                                         |            | X         |          |          | X        |
| Lags of #subscribers (31-45 days ago)                       |            |           | X        |          | X        |
| Trends of #subscribers                                      |            |           |          | X        | X        |

*Notes:* Table indicates  $R^2$  of 10 different models that attempt to predict residual violence, where residual violence is defined as the residuals obtained by regressing violence on the control variables in our main Equation (1). Specifically, we first regress the occurrence of violence on day  $t$  on the control variables in (1), i.e.,  $g(\mathbb{E}(T_{dt}|\gamma_d, \lambda_t, T_{d,t+\tau})) = \gamma_d + \lambda_t + \sum_{\tau \in [-30, 180] \setminus \{0\}} \beta_\tau T_{d,t+\tau}$ , and obtain the residuals  $T_{dt} - \hat{\mathbb{E}}(T_{dt})$ . We then attempt to predict those residuals using the variables listed in Panel B, where ‘lags of migration’ refers to 1-15 day lags of the 30-day migration outcome  $Y_{dt,30}$ , and ‘lags of number of subscribers’ refers to 1-15 day lags of the number of subscribers observed to be in district  $d$  at time  $t - 30$ , i.e., 31-45 days ago. Trends refer to using differences of the migration outcome and number of subscribers as predictors: i.e.,  $\Delta x_{t-1} = x_{t-1} - x_{t-2}$ ,  $\Delta x_{t-2} = x_{t-2} - x_{t-3}$ , etc. Each column of Panel A reports the performance ( $R^2$ ) of two different models: a linear regression (first row) and a 10-fold cross-validated random forest (second row).

Supplementary Table 2: Full model results for Figure 2a.

| Days after violence | Estimate | CI lower | CI upper | p-value |
|---------------------|----------|----------|----------|---------|
| 1                   | 1.0276   | 1.0048   | 1.0508   | 0.0171  |
| 2                   | 1.0227   | 1.0047   | 1.0411   | 0.0132  |
| 3                   | 1.0327   | 1.0165   | 1.0492   | 0.0001  |
| 4                   | 1.0377   | 1.0233   | 1.0524   | 0.0000  |
| 5                   | 1.0340   | 1.0191   | 1.0491   | 0.0000  |
| 6                   | 1.0369   | 1.0215   | 1.0525   | 0.0000  |
| 7                   | 1.0380   | 1.0229   | 1.0533   | 0.0000  |
| 8                   | 1.0395   | 1.0248   | 1.0543   | 0.0000  |
| 9                   | 1.0404   | 1.0256   | 1.0554   | 0.0000  |
| 10                  | 1.0403   | 1.0259   | 1.0548   | 0.0000  |
| 11                  | 1.0394   | 1.0247   | 1.0542   | 0.0000  |
| 12                  | 1.0369   | 1.0221   | 1.0519   | 0.0000  |
| 13                  | 1.0341   | 1.0201   | 1.0484   | 0.0000  |
| 14                  | 1.0338   | 1.0198   | 1.0480   | 0.0000  |
| 15                  | 1.0325   | 1.0187   | 1.0465   | 0.0000  |
| 16                  | 1.0311   | 1.0170   | 1.0454   | 0.0000  |
| 17                  | 1.0291   | 1.0147   | 1.0438   | 0.0001  |
| 18                  | 1.0288   | 1.0142   | 1.0437   | 0.0001  |
| 19                  | 1.0291   | 1.0146   | 1.0437   | 0.0001  |
| 20                  | 1.0267   | 1.0120   | 1.0417   | 0.0004  |
| 21                  | 1.0257   | 1.0112   | 1.0405   | 0.0005  |
| 22                  | 1.0253   | 1.0107   | 1.0400   | 0.0006  |
| 23                  | 1.0249   | 1.0107   | 1.0392   | 0.0006  |
| 24                  | 1.0228   | 1.0087   | 1.0371   | 0.0014  |
| 25                  | 1.0231   | 1.0087   | 1.0376   | 0.0016  |
| 26                  | 1.0212   | 1.0065   | 1.0362   | 0.0045  |
| 27                  | 1.0213   | 1.0069   | 1.0359   | 0.0036  |
| 28                  | 1.0196   | 1.0056   | 1.0337   | 0.0058  |
| 29                  | 1.0202   | 1.0065   | 1.0341   | 0.0037  |
| 30                  | 1.0212   | 1.0075   | 1.0351   | 0.0024  |

Continued on next page

Supplementary Table 2 – continued from previous page

| Days after violence | Estimate | CI lower | CI upper | p-value |
|---------------------|----------|----------|----------|---------|
| 31                  | 1.0218   | 1.0078   | 1.0359   | 0.0022  |
| 32                  | 1.0237   | 1.0098   | 1.0379   | 0.0008  |
| 33                  | 1.0249   | 1.0110   | 1.0389   | 0.0004  |
| 34                  | 1.0261   | 1.0125   | 1.0399   | 0.0002  |
| 35                  | 1.0262   | 1.0127   | 1.0400   | 0.0001  |
| 36                  | 1.0254   | 1.0120   | 1.0389   | 0.0002  |
| 37                  | 1.0258   | 1.0127   | 1.0391   | 0.0001  |
| 38                  | 1.0246   | 1.0118   | 1.0377   | 0.0002  |
| 39                  | 1.0244   | 1.0117   | 1.0372   | 0.0002  |
| 40                  | 1.0239   | 1.0115   | 1.0363   | 0.0001  |
| 41                  | 1.0240   | 1.0115   | 1.0368   | 0.0002  |
| 42                  | 1.0229   | 1.0102   | 1.0357   | 0.0004  |
| 43                  | 1.0223   | 1.0098   | 1.0350   | 0.0005  |
| 44                  | 1.0209   | 1.0085   | 1.0336   | 0.0010  |
| 45                  | 1.0205   | 1.0079   | 1.0333   | 0.0014  |
| 46                  | 1.0196   | 1.0070   | 1.0325   | 0.0023  |
| 47                  | 1.0192   | 1.0069   | 1.0317   | 0.0022  |
| 48                  | 1.0188   | 1.0065   | 1.0313   | 0.0027  |
| 49                  | 1.0168   | 1.0048   | 1.0289   | 0.0061  |
| 50                  | 1.0171   | 1.0052   | 1.0290   | 0.0045  |
| 51                  | 1.0172   | 1.0052   | 1.0293   | 0.0048  |
| 52                  | 1.0169   | 1.0049   | 1.0291   | 0.0058  |
| 53                  | 1.0177   | 1.0058   | 1.0297   | 0.0034  |
| 54                  | 1.0167   | 1.0049   | 1.0287   | 0.0055  |
| 55                  | 1.0160   | 1.0040   | 1.0281   | 0.0088  |
| 56                  | 1.0152   | 1.0030   | 1.0276   | 0.0144  |
| 57                  | 1.0154   | 1.0032   | 1.0277   | 0.0133  |
| 58                  | 1.0154   | 1.0035   | 1.0275   | 0.0112  |
| 59                  | 1.0151   | 1.0031   | 1.0273   | 0.0133  |
| 60                  | 1.0142   | 1.0021   | 1.0264   | 0.0213  |
| 61                  | 1.0141   | 1.0020   | 1.0264   | 0.0226  |

Continued on next page



Supplementary Table 2 – continued from previous page

| Days after violence | Estimate | CI lower | CI upper | p-value |
|---------------------|----------|----------|----------|---------|
| 62                  | 1.0140   | 1.0023   | 1.0258   | 0.0193  |
| 63                  | 1.0147   | 1.0033   | 1.0262   | 0.0114  |
| 64                  | 1.0156   | 1.0043   | 1.0269   | 0.0066  |
| 65                  | 1.0162   | 1.0049   | 1.0275   | 0.0046  |
| 66                  | 1.0169   | 1.0057   | 1.0281   | 0.0029  |
| 67                  | 1.0168   | 1.0056   | 1.0282   | 0.0033  |
| 68                  | 1.0156   | 1.0042   | 1.0272   | 0.0074  |
| 69                  | 1.0152   | 1.0037   | 1.0268   | 0.0092  |
| 70                  | 1.0127   | 1.0009   | 1.0246   | 0.0355  |
| 71                  | 1.0130   | 1.0013   | 1.0248   | 0.0291  |
| 72                  | 1.0128   | 1.0014   | 1.0242   | 0.0273  |
| 73                  | 1.0126   | 1.0014   | 1.0239   | 0.0271  |
| 74                  | 1.0124   | 1.0013   | 1.0235   | 0.0279  |
| 75                  | 1.0132   | 1.0022   | 1.0243   | 0.0181  |
| 76                  | 1.0129   | 1.0020   | 1.0239   | 0.0201  |
| 77                  | 1.0129   | 1.0022   | 1.0237   | 0.0181  |
| 78                  | 1.0138   | 1.0028   | 1.0249   | 0.0138  |
| 79                  | 1.0143   | 1.0035   | 1.0253   | 0.0095  |
| 80                  | 1.0161   | 1.0056   | 1.0267   | 0.0025  |
| 81                  | 1.0161   | 1.0055   | 1.0269   | 0.0028  |
| 82                  | 1.0175   | 1.0069   | 1.0281   | 0.0011  |
| 83                  | 1.0178   | 1.0070   | 1.0287   | 0.0012  |
| 84                  | 1.0182   | 1.0075   | 1.0291   | 0.0008  |
| 85                  | 1.0198   | 1.0088   | 1.0308   | 0.0004  |
| 86                  | 1.0196   | 1.0087   | 1.0306   | 0.0004  |
| 87                  | 1.0188   | 1.0081   | 1.0297   | 0.0006  |
| 88                  | 1.0198   | 1.0094   | 1.0304   | 0.0002  |
| 89                  | 1.0193   | 1.0088   | 1.0299   | 0.0003  |
| 90                  | 1.0194   | 1.0090   | 1.0298   | 0.0002  |
| 91                  | 1.0184   | 1.0078   | 1.0292   | 0.0006  |
| 92                  | 1.0186   | 1.0080   | 1.0293   | 0.0006  |

Continued on next page

Supplementary Table 2 – continued from previous page

| Days after violence | Estimate | CI lower | CI upper | p-value |
|---------------------|----------|----------|----------|---------|
| 93                  | 1.0176   | 1.0071   | 1.0282   | 0.0010  |
| 94                  | 1.0185   | 1.0078   | 1.0293   | 0.0006  |
| 95                  | 1.0178   | 1.0070   | 1.0286   | 0.0011  |
| 96                  | 1.0179   | 1.0071   | 1.0288   | 0.0012  |
| 97                  | 1.0192   | 1.0082   | 1.0303   | 0.0006  |
| 98                  | 1.0179   | 1.0066   | 1.0294   | 0.0019  |
| 99                  | 1.0180   | 1.0066   | 1.0296   | 0.0019  |
| 100                 | 1.0187   | 1.0071   | 1.0304   | 0.0016  |
| 101                 | 1.0193   | 1.0076   | 1.0311   | 0.0012  |
| 102                 | 1.0185   | 1.0067   | 1.0304   | 0.0020  |
| 103                 | 1.0183   | 1.0064   | 1.0304   | 0.0024  |
| 104                 | 1.0182   | 1.0063   | 1.0302   | 0.0026  |
| 105                 | 1.0187   | 1.0068   | 1.0308   | 0.0020  |
| 106                 | 1.0188   | 1.0067   | 1.0311   | 0.0022  |
| 107                 | 1.0186   | 1.0064   | 1.0308   | 0.0026  |
| 108                 | 1.0179   | 1.0060   | 1.0299   | 0.0031  |
| 109                 | 1.0180   | 1.0061   | 1.0301   | 0.0030  |
| 110                 | 1.0200   | 1.0080   | 1.0321   | 0.0010  |
| 111                 | 1.0209   | 1.0089   | 1.0331   | 0.0006  |
| 112                 | 1.0190   | 1.0069   | 1.0312   | 0.0020  |
| 113                 | 1.0183   | 1.0062   | 1.0306   | 0.0030  |
| 114                 | 1.0177   | 1.0054   | 1.0303   | 0.0049  |
| 115                 | 1.0175   | 1.0049   | 1.0303   | 0.0064  |
| 116                 | 1.0178   | 1.0052   | 1.0306   | 0.0056  |
| 117                 | 1.0169   | 1.0047   | 1.0291   | 0.0064  |
| 118                 | 1.0159   | 1.0038   | 1.0281   | 0.0098  |
| 119                 | 1.0151   | 1.0030   | 1.0273   | 0.0139  |
| 120                 | 1.0166   | 1.0046   | 1.0287   | 0.0067  |

Supplementary Table 3: Full model results for Figure 2b.

| Lag | Estimate | CI lower | CI upper | p-value |
|-----|----------|----------|----------|---------|
| -30 | 0.9999   | 0.9866   | 1.0135   | 0.9913  |
| -29 | 1.0010   | 0.9878   | 1.0143   | 0.8873  |
| -28 | 1.0016   | 0.9887   | 1.0146   | 0.8125  |
| -27 | 1.0015   | 0.9888   | 1.0144   | 0.8212  |
| -26 | 1.0021   | 0.9905   | 1.0139   | 0.7217  |
| -25 | 1.0008   | 0.9896   | 1.0120   | 0.8944  |
| -24 | 0.9991   | 0.9880   | 1.0104   | 0.8816  |
| -23 | 0.9997   | 0.9884   | 1.0111   | 0.9608  |
| -22 | 0.9968   | 0.9854   | 1.0084   | 0.5869  |
| -21 | 0.9968   | 0.9856   | 1.0082   | 0.5801  |
| -20 | 0.9968   | 0.9851   | 1.0087   | 0.5962  |
| -19 | 0.9977   | 0.9857   | 1.0097   | 0.7017  |
| -18 | 0.9961   | 0.9842   | 1.0081   | 0.5226  |
| -17 | 0.9977   | 0.9859   | 1.0097   | 0.7115  |
| -16 | 0.9995   | 0.9880   | 1.0111   | 0.9327  |
| -15 | 1.0035   | 0.9927   | 1.0144   | 0.5255  |
| -14 | 1.0051   | 0.9951   | 1.0152   | 0.3164  |
| -13 | 1.0063   | 0.9962   | 1.0166   | 0.2212  |
| -12 | 1.0047   | 0.9934   | 1.0161   | 0.4193  |
| -11 | 1.0054   | 0.9939   | 1.0171   | 0.3573  |
| -10 | 1.0097   | 0.9982   | 1.0212   | 0.0975  |
| -9  | 1.0088   | 0.9978   | 1.0200   | 0.1183  |
| -8  | 1.0088   | 0.9975   | 1.0203   | 0.1254  |
| -7  | 1.0084   | 0.9969   | 1.0200   | 0.1538  |
| -6  | 1.0097   | 0.9983   | 1.0213   | 0.0961  |
| -5  | 1.0133   | 1.0024   | 1.0244   | 0.0168  |
| -4  | 1.0144   | 1.0037   | 1.0251   | 0.0080  |
| -3  | 1.0169   | 1.0064   | 1.0275   | 0.0016  |
| -2  | 1.0187   | 1.0085   | 1.0291   | 0.0003  |
| -1  | 1.0187   | 1.0083   | 1.0292   | 0.0004  |

Continued on next page

Supplementary Table 3 – continued from previous page

| Lag | Estimate | CI lower | CI upper | p-value |
|-----|----------|----------|----------|---------|
| 0   | 1.0199   | 1.0094   | 1.0305   | 0.0002  |
| 1   | 1.0225   | 1.0115   | 1.0335   | 0.0001  |
| 2   | 1.0239   | 1.0127   | 1.0352   | 0.0000  |
| 3   | 1.0229   | 1.0111   | 1.0350   | 0.0001  |
| 4   | 1.0202   | 1.0073   | 1.0333   | 0.0020  |
| 5   | 1.0225   | 1.0094   | 1.0356   | 0.0007  |
| 6   | 1.0250   | 1.0120   | 1.0381   | 0.0001  |
| 7   | 1.0222   | 1.0095   | 1.0349   | 0.0005  |
| 8   | 1.0230   | 1.0103   | 1.0359   | 0.0004  |
| 9   | 1.0248   | 1.0125   | 1.0372   | 0.0001  |
| 10  | 1.0250   | 1.0131   | 1.0370   | 0.0000  |
| 11  | 1.0262   | 1.0145   | 1.0380   | 0.0000  |
| 12  | 1.0266   | 1.0149   | 1.0384   | 0.0000  |
| 13  | 1.0253   | 1.0144   | 1.0362   | 0.0000  |
| 14  | 1.0256   | 1.0146   | 1.0366   | 0.0000  |
| 15  | 1.0265   | 1.0158   | 1.0373   | 0.0000  |
| 16  | 1.0274   | 1.0163   | 1.0386   | 0.0000  |
| 17  | 1.0256   | 1.0140   | 1.0374   | 0.0000  |
| 18  | 1.0249   | 1.0128   | 1.0372   | 0.0001  |
| 19  | 1.0220   | 1.0095   | 1.0346   | 0.0005  |
| 20  | 1.0202   | 1.0081   | 1.0325   | 0.0010  |
| 21  | 1.0219   | 1.0097   | 1.0344   | 0.0004  |
| 22  | 1.0246   | 1.0119   | 1.0374   | 0.0001  |
| 23  | 1.0246   | 1.0128   | 1.0366   | 0.0000  |
| 24  | 1.0242   | 1.0123   | 1.0363   | 0.0001  |
| 25  | 1.0238   | 1.0118   | 1.0359   | 0.0001  |
| 26  | 1.0232   | 1.0107   | 1.0359   | 0.0003  |
| 27  | 1.0223   | 1.0091   | 1.0357   | 0.0009  |
| 28  | 1.0206   | 1.0073   | 1.0340   | 0.0024  |
| 29  | 1.0214   | 1.0078   | 1.0352   | 0.0020  |
| 30  | 1.0212   | 1.0075   | 1.0351   | 0.0024  |

Continued on next page

Supplementary Table 3 – continued from previous page

| Lag | Estimate | CI lower | CI upper | p-value |
|-----|----------|----------|----------|---------|
| 31  | 1.0204   | 1.0067   | 1.0343   | 0.0035  |
| 32  | 1.0203   | 1.0065   | 1.0344   | 0.0039  |
| 33  | 1.0171   | 1.0033   | 1.0311   | 0.0152  |
| 34  | 1.0174   | 1.0033   | 1.0316   | 0.0154  |
| 35  | 1.0148   | 1.0014   | 1.0283   | 0.0301  |
| 36  | 1.0136   | 1.0004   | 1.0271   | 0.0441  |
| 37  | 1.0135   | 1.0004   | 1.0268   | 0.0433  |
| 38  | 1.0135   | 1.0005   | 1.0267   | 0.0422  |
| 39  | 1.0132   | 1.0003   | 1.0263   | 0.0447  |
| 40  | 1.0158   | 1.0038   | 1.0279   | 0.0095  |
| 41  | 1.0157   | 1.0040   | 1.0276   | 0.0086  |
| 42  | 1.0161   | 1.0039   | 1.0283   | 0.0092  |
| 43  | 1.0186   | 1.0065   | 1.0309   | 0.0025  |
| 44  | 1.0193   | 1.0075   | 1.0313   | 0.0014  |
| 45  | 1.0175   | 1.0055   | 1.0296   | 0.0040  |
| 46  | 1.0152   | 1.0037   | 1.0268   | 0.0092  |
| 47  | 1.0140   | 1.0022   | 1.0259   | 0.0201  |
| 48  | 1.0120   | 1.0000   | 1.0241   | 0.0496  |
| 49  | 1.0119   | 0.9999   | 1.0239   | 0.0512  |
| 50  | 1.0117   | 1.0002   | 1.0233   | 0.0458  |
| 51  | 1.0140   | 1.0020   | 1.0262   | 0.0222  |
| 52  | 1.0155   | 1.0046   | 1.0265   | 0.0051  |
| 53  | 1.0146   | 1.0032   | 1.0261   | 0.0121  |
| 54  | 1.0159   | 1.0049   | 1.0270   | 0.0045  |
| 55  | 1.0149   | 1.0039   | 1.0260   | 0.0079  |
| 56  | 1.0104   | 0.9989   | 1.0222   | 0.0771  |
| 57  | 1.0098   | 0.9979   | 1.0219   | 0.1076  |
| 58  | 1.0128   | 1.0006   | 1.0252   | 0.0401  |
| 59  | 1.0121   | 0.9994   | 1.0249   | 0.0627  |
| 60  | 1.0100   | 0.9977   | 1.0223   | 0.1105  |
| 61  | 1.0102   | 0.9980   | 1.0226   | 0.1006  |

Continued on next page

Supplementary Table 3 – continued from previous page

| Lag | Estimate | CI lower | CI upper | p-value |
|-----|----------|----------|----------|---------|
| 62  | 1.0111   | 0.9988   | 1.0234   | 0.0763  |
| 63  | 1.0096   | 0.9977   | 1.0218   | 0.1153  |
| 64  | 1.0101   | 0.9980   | 1.0223   | 0.1025  |
| 65  | 1.0109   | 0.9993   | 1.0226   | 0.0645  |
| 66  | 1.0116   | 1.0005   | 1.0228   | 0.0406  |
| 67  | 1.0127   | 1.0019   | 1.0236   | 0.0216  |
| 68  | 1.0118   | 1.0013   | 1.0225   | 0.0279  |
| 69  | 1.0121   | 1.0014   | 1.0228   | 0.0264  |
| 70  | 1.0096   | 0.9987   | 1.0206   | 0.0847  |
| 71  | 1.0100   | 0.9989   | 1.0213   | 0.0788  |
| 72  | 1.0098   | 0.9986   | 1.0212   | 0.0878  |
| 73  | 1.0063   | 0.9961   | 1.0167   | 0.2249  |
| 74  | 1.0055   | 0.9950   | 1.0160   | 0.3063  |
| 75  | 1.0066   | 0.9959   | 1.0173   | 0.2276  |
| 76  | 1.0064   | 0.9954   | 1.0176   | 0.2546  |
| 77  | 1.0054   | 0.9942   | 1.0167   | 0.3453  |
| 78  | 1.0057   | 0.9951   | 1.0165   | 0.2922  |
| 79  | 1.0059   | 0.9955   | 1.0165   | 0.2671  |
| 80  | 1.0069   | 0.9959   | 1.0180   | 0.2179  |
| 81  | 1.0055   | 0.9942   | 1.0170   | 0.3415  |
| 82  | 1.0048   | 0.9939   | 1.0158   | 0.3903  |
| 83  | 1.0025   | 0.9918   | 1.0133   | 0.6517  |
| 84  | 1.0016   | 0.9908   | 1.0127   | 0.7677  |
| 85  | 1.0017   | 0.9910   | 1.0126   | 0.7523  |
| 86  | 1.0029   | 0.9921   | 1.0138   | 0.6043  |
| 87  | 1.0044   | 0.9936   | 1.0153   | 0.4267  |
| 88  | 1.0039   | 0.9927   | 1.0151   | 0.4993  |
| 89  | 1.0026   | 0.9917   | 1.0136   | 0.6400  |
| 90  | 1.0009   | 0.9888   | 1.0131   | 0.8868  |
| 91  | 1.0028   | 0.9902   | 1.0156   | 0.6656  |
| 92  | 1.0004   | 0.9865   | 1.0145   | 0.9523  |

Continued on next page

Supplementary Table 3 – continued from previous page

| Lag | Estimate | CI lower | CI upper | p-value |
|-----|----------|----------|----------|---------|
| 93  | 1.0021   | 0.9885   | 1.0159   | 0.7632  |
| 94  | 1.0034   | 0.9899   | 1.0171   | 0.6266  |
| 95  | 1.0035   | 0.9896   | 1.0177   | 0.6217  |
| 96  | 1.0035   | 0.9897   | 1.0175   | 0.6190  |
| 97  | 1.0039   | 0.9898   | 1.0182   | 0.5859  |
| 98  | 1.0016   | 0.9869   | 1.0166   | 0.8292  |
| 99  | 1.0034   | 0.9886   | 1.0185   | 0.6525  |
| 100 | 1.0024   | 0.9879   | 1.0171   | 0.7479  |
| 101 | 1.0012   | 0.9869   | 1.0156   | 0.8734  |
| 102 | 1.0019   | 0.9877   | 1.0162   | 0.7992  |
| 103 | 1.0014   | 0.9872   | 1.0157   | 0.8483  |
| 104 | 0.9994   | 0.9843   | 1.0148   | 0.9405  |
| 105 | 0.9998   | 0.9847   | 1.0152   | 0.9814  |
| 106 | 1.0023   | 0.9883   | 1.0166   | 0.7472  |
| 107 | 1.0039   | 0.9897   | 1.0183   | 0.5939  |
| 108 | 1.0054   | 0.9915   | 1.0195   | 0.4483  |
| 109 | 1.0045   | 0.9905   | 1.0187   | 0.5314  |
| 110 | 1.0035   | 0.9896   | 1.0175   | 0.6245  |
| 111 | 1.0013   | 0.9885   | 1.0143   | 0.8410  |
| 112 | 1.0008   | 0.9883   | 1.0135   | 0.8976  |
| 113 | 1.0025   | 0.9903   | 1.0148   | 0.6909  |
| 114 | 1.0045   | 0.9926   | 1.0166   | 0.4579  |
| 115 | 1.0040   | 0.9919   | 1.0161   | 0.5192  |
| 116 | 1.0041   | 0.9920   | 1.0163   | 0.5064  |
| 117 | 1.0056   | 0.9936   | 1.0178   | 0.3605  |
| 118 | 1.0047   | 0.9930   | 1.0166   | 0.4285  |
| 119 | 1.0037   | 0.9917   | 1.0159   | 0.5485  |
| 120 | 1.0077   | 0.9958   | 1.0198   | 0.2040  |
| 121 | 1.0072   | 0.9956   | 1.0190   | 0.2224  |
| 122 | 1.0055   | 0.9939   | 1.0172   | 0.3563  |
| 123 | 1.0077   | 0.9955   | 1.0200   | 0.2190  |

Continued on next page

Supplementary Table 3 – continued from previous page

| Lag | Estimate | CI lower | CI upper | p-value |
|-----|----------|----------|----------|---------|
| 124 | 1.0071   | 0.9955   | 1.0189   | 0.2288  |
| 125 | 1.0086   | 0.9976   | 1.0197   | 0.1254  |
| 126 | 1.0087   | 0.9979   | 1.0196   | 0.1133  |
| 127 | 1.0079   | 0.9974   | 1.0185   | 0.1408  |
| 128 | 1.0068   | 0.9968   | 1.0170   | 0.1831  |
| 129 | 1.0075   | 0.9976   | 1.0176   | 0.1370  |
| 130 | 1.0060   | 0.9957   | 1.0164   | 0.2574  |
| 131 | 1.0085   | 0.9985   | 1.0187   | 0.0969  |
| 132 | 1.0093   | 0.9989   | 1.0198   | 0.0790  |
| 133 | 1.0121   | 1.0016   | 1.0228   | 0.0243  |
| 134 | 1.0113   | 1.0014   | 1.0213   | 0.0249  |
| 135 | 1.0097   | 0.9999   | 1.0197   | 0.0533  |
| 136 | 1.0105   | 1.0007   | 1.0204   | 0.0359  |
| 137 | 1.0088   | 0.9988   | 1.0190   | 0.0850  |
| 138 | 1.0091   | 0.9988   | 1.0194   | 0.0822  |
| 139 | 1.0059   | 0.9950   | 1.0170   | 0.2901  |
| 140 | 1.0046   | 0.9935   | 1.0159   | 0.4204  |
| 141 | 1.0077   | 0.9965   | 1.0191   | 0.1785  |
| 142 | 1.0041   | 0.9925   | 1.0158   | 0.4942  |
| 143 | 1.0035   | 0.9912   | 1.0159   | 0.5787  |
| 144 | 1.0047   | 0.9923   | 1.0173   | 0.4562  |
| 145 | 1.0039   | 0.9912   | 1.0167   | 0.5509  |
| 146 | 1.0031   | 0.9898   | 1.0166   | 0.6450  |
| 147 | 1.0024   | 0.9889   | 1.0160   | 0.7297  |
| 148 | 1.0004   | 0.9868   | 1.0142   | 0.9539  |
| 149 | 1.0015   | 0.9886   | 1.0146   | 0.8217  |
| 150 | 0.9993   | 0.9851   | 1.0137   | 0.9229  |
| 151 | 1.0008   | 0.9865   | 1.0153   | 0.9120  |
| 152 | 1.0020   | 0.9876   | 1.0167   | 0.7843  |
| 153 | 1.0008   | 0.9866   | 1.0153   | 0.9081  |
| 154 | 0.9985   | 0.9840   | 1.0131   | 0.8378  |

Continued on next page



Supplementary Table 3 – continued from previous page

| Lag | Estimate | CI lower | CI upper | p-value |
|-----|----------|----------|----------|---------|
| 155 | 1.0005   | 0.9864   | 1.0149   | 0.9424  |
| 156 | 1.0022   | 0.9882   | 1.0165   | 0.7577  |
| 157 | 1.0055   | 0.9925   | 1.0187   | 0.4052  |
| 158 | 1.0042   | 0.9919   | 1.0167   | 0.5029  |
| 159 | 1.0012   | 0.9885   | 1.0140   | 0.8584  |
| 160 | 0.9996   | 0.9871   | 1.0123   | 0.9502  |
| 161 | 1.0017   | 0.9900   | 1.0136   | 0.7720  |
| 162 | 1.0053   | 0.9936   | 1.0172   | 0.3745  |
| 163 | 1.0059   | 0.9944   | 1.0175   | 0.3149  |
| 164 | 1.0063   | 0.9951   | 1.0178   | 0.2721  |
| 165 | 1.0084   | 0.9970   | 1.0200   | 0.1495  |
| 166 | 1.0106   | 0.9996   | 1.0217   | 0.0582  |
| 167 | 1.0120   | 1.0009   | 1.0233   | 0.0348  |
| 168 | 1.0101   | 0.9984   | 1.0219   | 0.0903  |
| 169 | 1.0108   | 0.9987   | 1.0230   | 0.0806  |
| 170 | 1.0106   | 0.9981   | 1.0233   | 0.0974  |
| 171 | 1.0077   | 0.9953   | 1.0203   | 0.2219  |
| 172 | 1.0054   | 0.9931   | 1.0179   | 0.3931  |
| 173 | 1.0049   | 0.9925   | 1.0174   | 0.4388  |
| 174 | 1.0027   | 0.9905   | 1.0150   | 0.6668  |
| 175 | 1.0010   | 0.9886   | 1.0135   | 0.8806  |
| 176 | 0.9983   | 0.9860   | 1.0106   | 0.7812  |
| 177 | 0.9994   | 0.9874   | 1.0115   | 0.9217  |
| 178 | 0.9990   | 0.9871   | 1.0111   | 0.8720  |
| 179 | 1.0015   | 0.9887   | 1.0145   | 0.8169  |
| 180 | 1.0024   | 0.9889   | 1.0161   | 0.7253  |

Supplementary Table 4: Full model results for Figure 3a.

| Days after violence | Type of violence | Estimate | CI lower | CI upper | p-value |
|---------------------|------------------|----------|----------|----------|---------|
| 1                   | IS               | 1.1272   | 1.0574   | 1.2015   | 0.0002  |
| 1                   | Taliban          | 1.0192   | 0.9957   | 1.0433   | 0.1107  |
| 2                   | IS               | 1.1167   | 1.0440   | 1.1944   | 0.0013  |
| 2                   | Taliban          | 1.0158   | 0.9969   | 1.0351   | 0.1010  |
| 3                   | IS               | 1.1064   | 1.0522   | 1.1634   | 0.0001  |
| 3                   | Taliban          | 1.0270   | 1.0097   | 1.0445   | 0.0021  |
| 4                   | IS               | 1.0842   | 1.0195   | 1.1531   | 0.0100  |
| 4                   | Taliban          | 1.0335   | 1.0181   | 1.0490   | 0.0000  |
| 5                   | IS               | 1.0653   | 1.0151   | 1.1180   | 0.0102  |
| 5                   | Taliban          | 1.0310   | 1.0153   | 1.0470   | 0.0001  |
| 6                   | IS               | 1.0569   | 1.0054   | 1.1110   | 0.0299  |
| 6                   | Taliban          | 1.0353   | 1.0191   | 1.0518   | 0.0000  |
| 7                   | IS               | 1.0765   | 1.0199   | 1.1362   | 0.0074  |
| 7                   | Taliban          | 1.0355   | 1.0195   | 1.0517   | 0.0000  |
| 8                   | IS               | 1.0890   | 1.0394   | 1.1409   | 0.0003  |
| 8                   | Taliban          | 1.0364   | 1.0210   | 1.0521   | 0.0000  |
| 9                   | IS               | 1.0907   | 1.0401   | 1.1437   | 0.0003  |
| 9                   | Taliban          | 1.0377   | 1.0222   | 1.0535   | 0.0000  |
| 10                  | IS               | 1.0791   | 1.0324   | 1.1278   | 0.0007  |
| 10                  | Taliban          | 1.0383   | 1.0233   | 1.0537   | 0.0000  |
| 11                  | IS               | 1.0710   | 1.0233   | 1.1208   | 0.0032  |
| 11                  | Taliban          | 1.0380   | 1.0225   | 1.0537   | 0.0000  |
| 12                  | IS               | 1.0680   | 1.0201   | 1.1180   | 0.0049  |
| 12                  | Taliban          | 1.0357   | 1.0203   | 1.0513   | 0.0000  |
| 13                  | IS               | 1.0552   | 1.0144   | 1.0976   | 0.0075  |
| 13                  | Taliban          | 1.0333   | 1.0185   | 1.0483   | 0.0000  |
| 14                  | IS               | 1.0561   | 1.0103   | 1.1039   | 0.0159  |
| 14                  | Taliban          | 1.0334   | 1.0187   | 1.0484   | 0.0000  |
| 15                  | IS               | 1.0562   | 1.0139   | 1.1003   | 0.0088  |
| 15                  | Taliban          | 1.0317   | 1.0172   | 1.0463   | 0.0000  |
| 16                  | IS               | 1.0599   | 1.0177   | 1.1038   | 0.0050  |

Continued on next page

Supplementary Table 4 – continued from previous page

| Days after violence | Type of violence | Estimate | CI lower | CI upper | p-value |
|---------------------|------------------|----------|----------|----------|---------|
| 16                  | Taliban          | 1.0301   | 1.0154   | 1.0451   | 0.0001  |
| 17                  | IS               | 1.0353   | 0.9950   | 1.0771   | 0.0868  |
| 17                  | Taliban          | 1.0294   | 1.0141   | 1.0450   | 0.0002  |
| 18                  | IS               | 1.0351   | 0.9939   | 1.0781   | 0.0959  |
| 18                  | Taliban          | 1.0288   | 1.0133   | 1.0446   | 0.0002  |
| 19                  | IS               | 1.0258   | 0.9772   | 1.0769   | 0.3036  |
| 19                  | Taliban          | 1.0297   | 1.0144   | 1.0453   | 0.0001  |
| 20                  | IS               | 1.0217   | 0.9704   | 1.0756   | 0.4148  |
| 20                  | Taliban          | 1.0272   | 1.0116   | 1.0430   | 0.0006  |
| 21                  | IS               | 1.0256   | 0.9660   | 1.0888   | 0.4083  |
| 21                  | Taliban          | 1.0261   | 1.0107   | 1.0416   | 0.0008  |
| 22                  | IS               | 1.0271   | 0.9663   | 1.0918   | 0.3907  |
| 22                  | Taliban          | 1.0256   | 1.0103   | 1.0411   | 0.0010  |
| 23                  | IS               | 1.0237   | 0.9589   | 1.0929   | 0.4823  |
| 23                  | Taliban          | 1.0253   | 1.0103   | 1.0405   | 0.0009  |
| 24                  | IS               | 1.0234   | 0.9638   | 1.0867   | 0.4507  |
| 24                  | Taliban          | 1.0234   | 1.0085   | 1.0385   | 0.0020  |
| 25                  | IS               | 1.0025   | 0.9542   | 1.0533   | 0.9207  |
| 25                  | Taliban          | 1.0246   | 1.0094   | 1.0400   | 0.0014  |
| 26                  | IS               | 0.9802   | 0.9166   | 1.0482   | 0.5597  |
| 26                  | Taliban          | 1.0238   | 1.0085   | 1.0394   | 0.0022  |
| 27                  | IS               | 0.9839   | 0.9189   | 1.0534   | 0.6410  |
| 27                  | Taliban          | 1.0241   | 1.0091   | 1.0393   | 0.0016  |
| 28                  | IS               | 0.9845   | 0.9200   | 1.0536   | 0.6522  |
| 28                  | Taliban          | 1.0221   | 1.0076   | 1.0368   | 0.0026  |
| 29                  | IS               | 0.9879   | 0.9312   | 1.0480   | 0.6861  |
| 29                  | Taliban          | 1.0227   | 1.0084   | 1.0373   | 0.0018  |
| 30                  | IS               | 0.9958   | 0.9401   | 1.0548   | 0.8867  |
| 30                  | Taliban          | 1.0231   | 1.0087   | 1.0378   | 0.0017  |
| 31                  | IS               | 1.0060   | 0.9539   | 1.0610   | 0.8249  |
| 31                  | Taliban          | 1.0233   | 1.0085   | 1.0384   | 0.0020  |
| 32                  | IS               | 1.0157   | 0.9631   | 1.0710   | 0.5664  |

Continued on next page

Supplementary Table 4 – continued from previous page

| Days after violence | Type of violence | Estimate | CI lower | CI upper | p-value |
|---------------------|------------------|----------|----------|----------|---------|
| 32                  | Taliban          | 1.0249   | 1.0100   | 1.0399   | 0.0010  |
| 33                  | IS               | 1.0152   | 0.9614   | 1.0722   | 0.5866  |
| 33                  | Taliban          | 1.0260   | 1.0112   | 1.0409   | 0.0005  |
| 34                  | IS               | 1.0185   | 0.9647   | 1.0752   | 0.5081  |
| 34                  | Taliban          | 1.0271   | 1.0126   | 1.0417   | 0.0002  |
| 35                  | IS               | 1.0260   | 0.9729   | 1.0820   | 0.3435  |
| 35                  | Taliban          | 1.0268   | 1.0125   | 1.0414   | 0.0002  |
| 36                  | IS               | 1.0339   | 0.9840   | 1.0864   | 0.1869  |
| 36                  | Taliban          | 1.0256   | 1.0113   | 1.0401   | 0.0004  |
| 37                  | IS               | 1.0299   | 0.9793   | 1.0831   | 0.2525  |
| 37                  | Taliban          | 1.0261   | 1.0120   | 1.0404   | 0.0003  |
| 38                  | IS               | 1.0168   | 0.9418   | 1.0978   | 0.6699  |
| 38                  | Taliban          | 1.0257   | 1.0119   | 1.0396   | 0.0002  |
| 39                  | IS               | 1.0204   | 0.9445   | 1.1024   | 0.6084  |
| 39                  | Taliban          | 1.0253   | 1.0116   | 1.0391   | 0.0003  |
| 40                  | IS               | 1.0197   | 0.9456   | 1.0996   | 0.6130  |
| 40                  | Taliban          | 1.0248   | 1.0114   | 1.0383   | 0.0003  |
| 41                  | IS               | 1.0168   | 0.9471   | 1.0915   | 0.6460  |
| 41                  | Taliban          | 1.0251   | 1.0114   | 1.0389   | 0.0003  |
| 42                  | IS               | 1.0130   | 0.9483   | 1.0821   | 0.7023  |
| 42                  | Taliban          | 1.0239   | 1.0102   | 1.0378   | 0.0006  |
| 43                  | IS               | 1.0118   | 0.9603   | 1.0660   | 0.6596  |
| 43                  | Taliban          | 1.0232   | 1.0095   | 1.0372   | 0.0009  |
| 44                  | IS               | 1.0188   | 0.9747   | 1.0648   | 0.4095  |
| 44                  | Taliban          | 1.0213   | 1.0075   | 1.0353   | 0.0024  |
| 45                  | IS               | 1.0221   | 0.9797   | 1.0664   | 0.3115  |
| 45                  | Taliban          | 1.0205   | 1.0065   | 1.0347   | 0.0040  |
| 46                  | IS               | 1.0193   | 0.9743   | 1.0663   | 0.4066  |
| 46                  | Taliban          | 1.0199   | 1.0059   | 1.0340   | 0.0052  |
| 47                  | IS               | 1.0227   | 0.9751   | 1.0725   | 0.3559  |
| 47                  | Taliban          | 1.0194   | 1.0057   | 1.0332   | 0.0052  |
| 48                  | IS               | 1.0352   | 0.9938   | 1.0783   | 0.0967  |

Continued on next page

Supplementary Table 4 – continued from previous page

| Days after violence | Type of violence | Estimate | CI lower | CI upper | p-value |
|---------------------|------------------|----------|----------|----------|---------|
| 48                  | Taliban          | 1.0184   | 1.0047   | 1.0323   | 0.0083  |
| 49                  | IS               | 1.0404   | 1.0007   | 1.0816   | 0.0462  |
| 49                  | Taliban          | 1.0161   | 1.0028   | 1.0297   | 0.0178  |
| 50                  | IS               | 1.0352   | 0.9942   | 1.0779   | 0.0937  |
| 50                  | Taliban          | 1.0166   | 1.0035   | 1.0299   | 0.0127  |
| 51                  | IS               | 1.0430   | 0.9993   | 1.0886   | 0.0541  |
| 51                  | Taliban          | 1.0163   | 1.0031   | 1.0298   | 0.0158  |
| 52                  | IS               | 1.0442   | 0.9992   | 1.0911   | 0.0544  |
| 52                  | Taliban          | 1.0160   | 1.0028   | 1.0295   | 0.0174  |
| 53                  | IS               | 1.0471   | 1.0015   | 1.0948   | 0.0429  |
| 53                  | Taliban          | 1.0171   | 1.0041   | 1.0303   | 0.0099  |
| 54                  | IS               | 1.0446   | 0.9932   | 1.0987   | 0.0904  |
| 54                  | Taliban          | 1.0160   | 1.0031   | 1.0292   | 0.0151  |
| 55                  | IS               | 1.0488   | 0.9890   | 1.1122   | 0.1114  |
| 55                  | Taliban          | 1.0151   | 1.0022   | 1.0282   | 0.0220  |
| 56                  | IS               | 1.0606   | 1.0026   | 1.1219   | 0.0402  |
| 56                  | Taliban          | 1.0139   | 1.0007   | 1.0272   | 0.0384  |
| 57                  | IS               | 1.0559   | 1.0022   | 1.1124   | 0.0413  |
| 57                  | Taliban          | 1.0142   | 1.0010   | 1.0275   | 0.0343  |
| 58                  | IS               | 1.0521   | 1.0004   | 1.1065   | 0.0482  |
| 58                  | Taliban          | 1.0145   | 1.0016   | 1.0276   | 0.0279  |
| 59                  | IS               | 1.0493   | 1.0032   | 1.0975   | 0.0356  |
| 59                  | Taliban          | 1.0143   | 1.0012   | 1.0275   | 0.0318  |
| 60                  | IS               | 1.0394   | 0.9960   | 1.0846   | 0.0759  |
| 60                  | Taliban          | 1.0135   | 1.0004   | 1.0268   | 0.0430  |
| 61                  | IS               | 1.0423   | 0.9990   | 1.0874   | 0.0556  |
| 61                  | Taliban          | 1.0135   | 1.0003   | 1.0269   | 0.0457  |
| 62                  | IS               | 1.0453   | 1.0029   | 1.0894   | 0.0358  |
| 62                  | Taliban          | 1.0135   | 1.0007   | 1.0264   | 0.0388  |
| 63                  | IS               | 1.0394   | 0.9976   | 1.0828   | 0.0647  |
| 63                  | Taliban          | 1.0145   | 1.0021   | 1.0270   | 0.0214  |
| 64                  | IS               | 1.0396   | 0.9953   | 1.0858   | 0.0805  |

Continued on next page

Supplementary Table 4 – continued from previous page

| Days after violence | Type of violence | Estimate | CI lower | CI upper | p-value |
|---------------------|------------------|----------|----------|----------|---------|
| 64                  | Taliban          | 1.0153   | 1.0032   | 1.0276   | 0.0130  |
| 65                  | IS               | 1.0459   | 1.0019   | 1.0918   | 0.0408  |
| 65                  | Taliban          | 1.0157   | 1.0037   | 1.0279   | 0.0104  |
| 66                  | IS               | 1.0385   | 0.9942   | 1.0848   | 0.0891  |
| 66                  | Taliban          | 1.0167   | 1.0047   | 1.0289   | 0.0061  |
| 67                  | IS               | 1.0324   | 0.9873   | 1.0795   | 0.1620  |
| 67                  | Taliban          | 1.0168   | 1.0048   | 1.0290   | 0.0061  |
| 68                  | IS               | 1.0387   | 0.9937   | 1.0856   | 0.0928  |
| 68                  | Taliban          | 1.0153   | 1.0030   | 1.0277   | 0.0148  |
| 69                  | IS               | 1.0408   | 0.9985   | 1.0849   | 0.0591  |
| 69                  | Taliban          | 1.0149   | 1.0027   | 1.0273   | 0.0166  |
| 70                  | IS               | 1.0163   | 0.9451   | 1.0929   | 0.6624  |
| 70                  | Taliban          | 1.0133   | 1.0011   | 1.0257   | 0.0329  |
| 71                  | IS               | 1.0187   | 0.9532   | 1.0887   | 0.5848  |
| 71                  | Taliban          | 1.0138   | 1.0017   | 1.0260   | 0.0256  |
| 72                  | IS               | 1.0161   | 0.9526   | 1.0839   | 0.6276  |
| 72                  | Taliban          | 1.0136   | 1.0018   | 1.0257   | 0.0241  |
| 73                  | IS               | 1.0146   | 0.9502   | 1.0834   | 0.6645  |
| 73                  | Taliban          | 1.0139   | 1.0022   | 1.0257   | 0.0197  |
| 74                  | IS               | 1.0243   | 0.9629   | 1.0896   | 0.4469  |
| 74                  | Taliban          | 1.0135   | 1.0020   | 1.0252   | 0.0216  |
| 75                  | IS               | 1.0347   | 0.9830   | 1.0891   | 0.1919  |
| 75                  | Taliban          | 1.0143   | 1.0026   | 1.0260   | 0.0161  |
| 76                  | IS               | 1.0324   | 0.9826   | 1.0846   | 0.2060  |
| 76                  | Taliban          | 1.0140   | 1.0024   | 1.0258   | 0.0183  |
| 77                  | IS               | 1.0263   | 0.9760   | 1.0792   | 0.3108  |
| 77                  | Taliban          | 1.0142   | 1.0027   | 1.0258   | 0.0152  |
| 78                  | IS               | 1.0337   | 0.9841   | 1.0857   | 0.1862  |
| 78                  | Taliban          | 1.0149   | 1.0032   | 1.0267   | 0.0127  |
| 79                  | IS               | 1.0305   | 0.9750   | 1.0891   | 0.2873  |
| 79                  | Taliban          | 1.0153   | 1.0038   | 1.0270   | 0.0093  |
| 80                  | IS               | 1.0387   | 0.9909   | 1.0888   | 0.1146  |

Continued on next page

Supplementary Table 4 – continued from previous page

| Days after violence | Type of violence | Estimate | CI lower | CI upper | p-value |
|---------------------|------------------|----------|----------|----------|---------|
| 80                  | Taliban          | 1.0168   | 1.0056   | 1.0281   | 0.0032  |
| 81                  | IS               | 1.0436   | 0.9896   | 1.1005   | 0.1158  |
| 81                  | Taliban          | 1.0166   | 1.0053   | 1.0281   | 0.0040  |
| 82                  | IS               | 1.0497   | 0.9965   | 1.1057   | 0.0676  |
| 82                  | Taliban          | 1.0176   | 1.0063   | 1.0291   | 0.0021  |
| 83                  | IS               | 1.0576   | 0.9948   | 1.1244   | 0.0731  |
| 83                  | Taliban          | 1.0177   | 1.0062   | 1.0293   | 0.0025  |
| 84                  | IS               | 1.0594   | 0.9975   | 1.1252   | 0.0603  |
| 84                  | Taliban          | 1.0181   | 1.0066   | 1.0296   | 0.0019  |
| 85                  | IS               | 1.0614   | 1.0026   | 1.1237   | 0.0404  |
| 85                  | Taliban          | 1.0197   | 1.0079   | 1.0317   | 0.0010  |
| 86                  | IS               | 1.0616   | 1.0036   | 1.1230   | 0.0371  |
| 86                  | Taliban          | 1.0197   | 1.0079   | 1.0316   | 0.0011  |
| 87                  | IS               | 1.0606   | 1.0053   | 1.1189   | 0.0314  |
| 87                  | Taliban          | 1.0189   | 1.0073   | 1.0306   | 0.0013  |
| 88                  | IS               | 1.0655   | 1.0105   | 1.1236   | 0.0190  |
| 88                  | Taliban          | 1.0199   | 1.0088   | 1.0312   | 0.0004  |
| 89                  | IS               | 1.0650   | 1.0121   | 1.1207   | 0.0154  |
| 89                  | Taliban          | 1.0192   | 1.0079   | 1.0307   | 0.0008  |
| 90                  | IS               | 1.0548   | 1.0054   | 1.1066   | 0.0293  |
| 90                  | Taliban          | 1.0196   | 1.0084   | 1.0309   | 0.0006  |
| 91                  | IS               | 1.0494   | 1.0005   | 1.1007   | 0.0475  |
| 91                  | Taliban          | 1.0187   | 1.0073   | 1.0302   | 0.0012  |
| 92                  | IS               | 1.0543   | 1.0031   | 1.1080   | 0.0373  |
| 92                  | Taliban          | 1.0186   | 1.0073   | 1.0300   | 0.0012  |
| 93                  | IS               | 1.0465   | 0.9998   | 1.0954   | 0.0508  |
| 93                  | Taliban          | 1.0177   | 1.0065   | 1.0291   | 0.0019  |
| 94                  | IS               | 1.0450   | 0.9995   | 1.0926   | 0.0529  |
| 94                  | Taliban          | 1.0187   | 1.0074   | 1.0302   | 0.0012  |
| 95                  | IS               | 1.0493   | 1.0028   | 1.0979   | 0.0375  |
| 95                  | Taliban          | 1.0179   | 1.0065   | 1.0294   | 0.0020  |
| 96                  | IS               | 1.0530   | 1.0079   | 1.1000   | 0.0207  |

Continued on next page

Supplementary Table 4 – continued from previous page

| Days after violence | Type of violence | Estimate | CI lower | CI upper | p-value |
|---------------------|------------------|----------|----------|----------|---------|
| 96                  | Taliban          | 1.0180   | 1.0065   | 1.0296   | 0.0020  |
| 97                  | IS               | 1.0536   | 1.0096   | 1.0994   | 0.0164  |
| 97                  | Taliban          | 1.0193   | 1.0076   | 1.0311   | 0.0011  |
| 98                  | IS               | 1.0248   | 0.9688   | 1.0840   | 0.3933  |
| 98                  | Taliban          | 1.0190   | 1.0072   | 1.0310   | 0.0016  |
| 99                  | IS               | 1.0150   | 0.9603   | 1.0728   | 0.5994  |
| 99                  | Taliban          | 1.0194   | 1.0074   | 1.0315   | 0.0014  |
| 100                 | IS               | 1.0167   | 0.9623   | 1.0742   | 0.5548  |
| 100                 | Taliban          | 1.0201   | 1.0080   | 1.0324   | 0.0011  |
| 101                 | IS               | 1.0208   | 0.9736   | 1.0703   | 0.3934  |
| 101                 | Taliban          | 1.0207   | 1.0084   | 1.0332   | 0.0010  |
| 102                 | IS               | 1.0147   | 0.9677   | 1.0639   | 0.5469  |
| 102                 | Taliban          | 1.0201   | 1.0076   | 1.0327   | 0.0016  |
| 103                 | IS               | 1.0138   | 0.9717   | 1.0576   | 0.5267  |
| 103                 | Taliban          | 1.0200   | 1.0071   | 1.0330   | 0.0022  |
| 104                 | IS               | 1.0078   | 0.9701   | 1.0471   | 0.6883  |
| 104                 | Taliban          | 1.0200   | 1.0072   | 1.0331   | 0.0022  |
| 105                 | IS               | 1.0010   | 0.9621   | 1.0414   | 0.9619  |
| 105                 | Taliban          | 1.0208   | 1.0079   | 1.0339   | 0.0015  |
| 106                 | IS               | 0.9945   | 0.9528   | 1.0379   | 0.7986  |
| 106                 | Taliban          | 1.0211   | 1.0080   | 1.0343   | 0.0015  |
| 107                 | IS               | 0.9930   | 0.9487   | 1.0393   | 0.7625  |
| 107                 | Taliban          | 1.0210   | 1.0081   | 1.0342   | 0.0014  |
| 108                 | IS               | 0.9965   | 0.9536   | 1.0414   | 0.8766  |
| 108                 | Taliban          | 1.0201   | 1.0074   | 1.0331   | 0.0019  |
| 109                 | IS               | 0.9938   | 0.9490   | 1.0408   | 0.7935  |
| 109                 | Taliban          | 1.0203   | 1.0074   | 1.0333   | 0.0019  |
| 110                 | IS               | 0.9908   | 0.9488   | 1.0346   | 0.6742  |
| 110                 | Taliban          | 1.0224   | 1.0095   | 1.0354   | 0.0006  |
| 111                 | IS               | 0.9902   | 0.9446   | 1.0381   | 0.6842  |
| 111                 | Taliban          | 1.0233   | 1.0105   | 1.0364   | 0.0003  |
| 112                 | IS               | 0.9988   | 0.9599   | 1.0392   | 0.9513  |

Continued on next page



Supplementary Table 4 – continued from previous page

| Days after violence | Type of violence | Estimate | CI lower | CI upper | p-value |
|---------------------|------------------|----------|----------|----------|---------|
| 112                 | Taliban          | 1.0209   | 1.0079   | 1.0340   | 0.0016  |
| 113                 | IS               | 1.0015   | 0.9600   | 1.0448   | 0.9439  |
| 113                 | Taliban          | 1.0201   | 1.0071   | 1.0333   | 0.0024  |
| 114                 | IS               | 1.0064   | 0.9675   | 1.0468   | 0.7509  |
| 114                 | Taliban          | 1.0193   | 1.0059   | 1.0328   | 0.0046  |
| 115                 | IS               | 1.0124   | 0.9756   | 1.0506   | 0.5148  |
| 115                 | Taliban          | 1.0190   | 1.0054   | 1.0328   | 0.0060  |
| 116                 | IS               | 1.0204   | 0.9878   | 1.0541   | 0.2220  |
| 116                 | Taliban          | 1.0191   | 1.0054   | 1.0329   | 0.0061  |
| 117                 | IS               | 1.0259   | 0.9944   | 1.0583   | 0.1077  |
| 117                 | Taliban          | 1.0179   | 1.0046   | 1.0313   | 0.0079  |
| 118                 | IS               | 1.0251   | 0.9919   | 1.0594   | 0.1404  |
| 118                 | Taliban          | 1.0167   | 1.0035   | 1.0301   | 0.0133  |
| 119                 | IS               | 1.0217   | 0.9869   | 1.0578   | 0.2240  |
| 119                 | Taliban          | 1.0159   | 1.0027   | 1.0292   | 0.0184  |
| 120                 | IS               | 1.0240   | 0.9937   | 1.0553   | 0.1220  |
| 120                 | Taliban          | 1.0174   | 1.0042   | 1.0308   | 0.0097  |

Supplementary Table 5: Full model results for Figure 3b.

| Days after violence | Type of violence | Estimate | CI lower | CI upper | p-value |
|---------------------|------------------|----------|----------|----------|---------|
| 1                   | >=11 casualties  | 1.1106   | 1.0441   | 1.1815   | 0.0009  |
| 1                   | <11 casualties   | 1.0159   | 0.9919   | 1.0404   | 0.1949  |
| 2                   | >=11 casualties  | 1.0755   | 1.0134   | 1.1414   | 0.0164  |
| 2                   | <11 casualties   | 1.0151   | 0.9956   | 1.0350   | 0.1304  |
| 3                   | >=11 casualties  | 1.0856   | 1.0221   | 1.1531   | 0.0076  |
| 3                   | <11 casualties   | 1.0257   | 1.0084   | 1.0434   | 0.0035  |
| 4                   | >=11 casualties  | 1.0920   | 1.0322   | 1.1552   | 0.0022  |
| 4                   | <11 casualties   | 1.0305   | 1.0154   | 1.0458   | 0.0001  |
| 5                   | >=11 casualties  | 1.0842   | 1.0233   | 1.1488   | 0.0062  |
| 5                   | <11 casualties   | 1.0271   | 1.0123   | 1.0421   | 0.0003  |
| 6                   | >=11 casualties  | 1.0930   | 1.0293   | 1.1607   | 0.0037  |
| 6                   | <11 casualties   | 1.0289   | 1.0137   | 1.0443   | 0.0002  |
| 7                   | >=11 casualties  | 1.0922   | 1.0283   | 1.1600   | 0.0041  |
| 7                   | <11 casualties   | 1.0301   | 1.0156   | 1.0448   | 0.0000  |
| 8                   | >=11 casualties  | 1.0937   | 1.0343   | 1.1566   | 0.0017  |
| 8                   | <11 casualties   | 1.0315   | 1.0173   | 1.0460   | 0.0000  |
| 9                   | >=11 casualties  | 1.0799   | 1.0213   | 1.1419   | 0.0069  |
| 9                   | <11 casualties   | 1.0339   | 1.0198   | 1.0483   | 0.0000  |
| 10                  | >=11 casualties  | 1.0829   | 1.0262   | 1.1428   | 0.0037  |
| 10                  | <11 casualties   | 1.0334   | 1.0193   | 1.0476   | 0.0000  |
| 11                  | >=11 casualties  | 1.0751   | 1.0209   | 1.1322   | 0.0061  |
| 11                  | <11 casualties   | 1.0330   | 1.0185   | 1.0478   | 0.0000  |
| 12                  | >=11 casualties  | 1.0731   | 1.0193   | 1.1297   | 0.0071  |
| 12                  | <11 casualties   | 1.0304   | 1.0160   | 1.0450   | 0.0000  |
| 13                  | >=11 casualties  | 1.0651   | 1.0143   | 1.1185   | 0.0114  |
| 13                  | <11 casualties   | 1.0280   | 1.0141   | 1.0420   | 0.0001  |
| 14                  | >=11 casualties  | 1.0623   | 1.0128   | 1.1143   | 0.0131  |
| 14                  | <11 casualties   | 1.0280   | 1.0139   | 1.0422   | 0.0001  |
| 15                  | >=11 casualties  | 1.0639   | 1.0141   | 1.1162   | 0.0113  |
| 15                  | <11 casualties   | 1.0263   | 1.0127   | 1.0401   | 0.0001  |
| 16                  | >=11 casualties  | 1.0654   | 1.0151   | 1.1182   | 0.0102  |

Continued on next page

Supplementary Table 5 – continued from previous page

| Days after violence | Type of violence | Estimate | CI lower | CI upper | p-value |
|---------------------|------------------|----------|----------|----------|---------|
| 16                  | <11 casualties   | 1.0246   | 1.0108   | 1.0385   | 0.0004  |
| 17                  | >=11 casualties  | 1.0585   | 1.0095   | 1.1100   | 0.0187  |
| 17                  | <11 casualties   | 1.0234   | 1.0090   | 1.0380   | 0.0014  |
| 18                  | >=11 casualties  | 1.0586   | 1.0096   | 1.1099   | 0.0184  |
| 18                  | <11 casualties   | 1.0230   | 1.0085   | 1.0378   | 0.0019  |
| 19                  | >=11 casualties  | 1.0458   | 0.9975   | 1.0964   | 0.0634  |
| 19                  | <11 casualties   | 1.0244   | 1.0101   | 1.0389   | 0.0008  |
| 20                  | >=11 casualties  | 1.0435   | 0.9947   | 1.0946   | 0.0815  |
| 20                  | <11 casualties   | 1.0218   | 1.0074   | 1.0364   | 0.0029  |
| 21                  | >=11 casualties  | 1.0463   | 0.9970   | 1.0980   | 0.0663  |
| 21                  | <11 casualties   | 1.0203   | 1.0062   | 1.0345   | 0.0045  |
| 22                  | >=11 casualties  | 1.0402   | 0.9925   | 1.0903   | 0.0999  |
| 22                  | <11 casualties   | 1.0204   | 1.0062   | 1.0347   | 0.0048  |
| 23                  | >=11 casualties  | 1.0396   | 0.9920   | 1.0893   | 0.1041  |
| 23                  | <11 casualties   | 1.0202   | 1.0062   | 1.0343   | 0.0045  |
| 24                  | >=11 casualties  | 1.0326   | 0.9852   | 1.0823   | 0.1807  |
| 24                  | <11 casualties   | 1.0188   | 1.0049   | 1.0328   | 0.0077  |
| 25                  | >=11 casualties  | 1.0289   | 0.9815   | 1.0785   | 0.2361  |
| 25                  | <11 casualties   | 1.0195   | 1.0052   | 1.0339   | 0.0072  |
| 26                  | >=11 casualties  | 1.0255   | 0.9784   | 1.0748   | 0.2933  |
| 26                  | <11 casualties   | 1.0178   | 1.0030   | 1.0328   | 0.0179  |
| 27                  | >=11 casualties  | 1.0286   | 0.9820   | 1.0774   | 0.2334  |
| 27                  | <11 casualties   | 1.0177   | 1.0031   | 1.0324   | 0.0171  |
| 28                  | >=11 casualties  | 1.0250   | 0.9800   | 1.0720   | 0.2814  |
| 28                  | <11 casualties   | 1.0163   | 1.0020   | 1.0307   | 0.0249  |
| 29                  | >=11 casualties  | 1.0248   | 0.9806   | 1.0710   | 0.2759  |
| 29                  | <11 casualties   | 1.0172   | 1.0031   | 1.0316   | 0.0168  |
| 30                  | >=11 casualties  | 1.0283   | 0.9826   | 1.0761   | 0.2286  |
| 30                  | <11 casualties   | 1.0180   | 1.0036   | 1.0326   | 0.0143  |
| 31                  | >=11 casualties  | 1.0268   | 0.9803   | 1.0755   | 0.2629  |
| 31                  | <11 casualties   | 1.0188   | 1.0043   | 1.0336   | 0.0111  |
| 32                  | >=11 casualties  | 1.0308   | 0.9846   | 1.0792   | 0.1950  |

Continued on next page

Supplementary Table 5 – continued from previous page

| Days after violence | Type of violence | Estimate | CI lower | CI upper | p-value |
|---------------------|------------------|----------|----------|----------|---------|
| 32                  | <11 casualties   | 1.0205   | 1.0058   | 1.0354   | 0.0062  |
| 33                  | >=11 casualties  | 1.0313   | 0.9840   | 1.0809   | 0.1988  |
| 33                  | <11 casualties   | 1.0218   | 1.0072   | 1.0367   | 0.0034  |
| 34                  | >=11 casualties  | 1.0366   | 0.9885   | 1.0870   | 0.1383  |
| 34                  | <11 casualties   | 1.0226   | 1.0082   | 1.0373   | 0.0020  |
| 35                  | >=11 casualties  | 1.0401   | 0.9920   | 1.0906   | 0.1036  |
| 35                  | <11 casualties   | 1.0226   | 1.0077   | 1.0377   | 0.0029  |
| 36                  | >=11 casualties  | 1.0460   | 0.9973   | 1.0969   | 0.0643  |
| 36                  | <11 casualties   | 1.0211   | 1.0060   | 1.0365   | 0.0060  |
| 37                  | >=11 casualties  | 1.0474   | 0.9981   | 1.0992   | 0.0597  |
| 37                  | <11 casualties   | 1.0214   | 1.0067   | 1.0363   | 0.0041  |
| 38                  | >=11 casualties  | 1.0495   | 0.9982   | 1.1034   | 0.0587  |
| 38                  | <11 casualties   | 1.0199   | 1.0054   | 1.0346   | 0.0070  |
| 39                  | >=11 casualties  | 1.0501   | 0.9988   | 1.1040   | 0.0557  |
| 39                  | <11 casualties   | 1.0193   | 1.0048   | 1.0340   | 0.0090  |
| 40                  | >=11 casualties  | 1.0521   | 0.9995   | 1.1074   | 0.0524  |
| 40                  | <11 casualties   | 1.0182   | 1.0039   | 1.0326   | 0.0125  |
| 41                  | >=11 casualties  | 1.0556   | 1.0029   | 1.1111   | 0.0385  |
| 41                  | <11 casualties   | 1.0180   | 1.0035   | 1.0328   | 0.0150  |
| 42                  | >=11 casualties  | 1.0539   | 1.0007   | 1.1100   | 0.0471  |
| 42                  | <11 casualties   | 1.0169   | 1.0020   | 1.0320   | 0.0257  |
| 43                  | >=11 casualties  | 1.0469   | 0.9909   | 1.1062   | 0.1024  |
| 43                  | <11 casualties   | 1.0169   | 1.0021   | 1.0320   | 0.0254  |
| 44                  | >=11 casualties  | 1.0483   | 0.9930   | 1.1068   | 0.0881  |
| 44                  | <11 casualties   | 1.0153   | 1.0005   | 1.0304   | 0.0429  |
| 45                  | >=11 casualties  | 1.0476   | 0.9935   | 1.1046   | 0.0854  |
| 45                  | <11 casualties   | 1.0148   | 0.9998   | 1.0300   | 0.0527  |
| 46                  | >=11 casualties  | 1.0478   | 0.9945   | 1.1041   | 0.0798  |
| 46                  | <11 casualties   | 1.0139   | 0.9993   | 1.0287   | 0.0627  |
| 47                  | >=11 casualties  | 1.0489   | 0.9954   | 1.1053   | 0.0736  |
| 47                  | <11 casualties   | 1.0132   | 0.9993   | 1.0272   | 0.0622  |
| 48                  | >=11 casualties  | 1.0532   | 0.9997   | 1.1096   | 0.0512  |

Continued on next page

Supplementary Table 5 – continued from previous page

| Days after violence | Type of violence | Estimate | CI lower | CI upper | p-value |
|---------------------|------------------|----------|----------|----------|---------|
| 48                  | <11 casualties   | 1.0121   | 0.9982   | 1.0261   | 0.0877  |
| 49                  | >=11 casualties  | 1.0562   | 1.0017   | 1.1136   | 0.0431  |
| 49                  | <11 casualties   | 1.0096   | 0.9962   | 1.0232   | 0.1609  |
| 50                  | >=11 casualties  | 1.0575   | 1.0031   | 1.1149   | 0.0380  |
| 50                  | <11 casualties   | 1.0098   | 0.9966   | 1.0231   | 0.1455  |
| 51                  | >=11 casualties  | 1.0621   | 1.0063   | 1.1211   | 0.0288  |
| 51                  | <11 casualties   | 1.0093   | 0.9963   | 1.0226   | 0.1619  |
| 52                  | >=11 casualties  | 1.0630   | 1.0059   | 1.1233   | 0.0301  |
| 52                  | <11 casualties   | 1.0088   | 0.9957   | 1.0221   | 0.1880  |
| 53                  | >=11 casualties  | 1.0644   | 1.0073   | 1.1249   | 0.0266  |
| 53                  | <11 casualties   | 1.0094   | 0.9966   | 1.0223   | 0.1517  |
| 54                  | >=11 casualties  | 1.0626   | 1.0059   | 1.1226   | 0.0300  |
| 54                  | <11 casualties   | 1.0084   | 0.9957   | 1.0213   | 0.1945  |
| 55                  | >=11 casualties  | 1.0666   | 1.0095   | 1.1270   | 0.0217  |
| 55                  | <11 casualties   | 1.0072   | 0.9944   | 1.0201   | 0.2716  |
| 56                  | >=11 casualties  | 1.0692   | 1.0110   | 1.1308   | 0.0191  |
| 56                  | <11 casualties   | 1.0061   | 0.9936   | 1.0187   | 0.3406  |
| 57                  | >=11 casualties  | 1.0671   | 1.0093   | 1.1281   | 0.0223  |
| 57                  | <11 casualties   | 1.0066   | 0.9941   | 1.0192   | 0.3041  |
| 58                  | >=11 casualties  | 1.0656   | 1.0075   | 1.1271   | 0.0264  |
| 58                  | <11 casualties   | 1.0069   | 0.9945   | 1.0196   | 0.2763  |
| 59                  | >=11 casualties  | 1.0618   | 1.0052   | 1.1217   | 0.0320  |
| 59                  | <11 casualties   | 1.0071   | 0.9948   | 1.0197   | 0.2596  |
| 60                  | >=11 casualties  | 1.0589   | 1.0040   | 1.1167   | 0.0350  |
| 60                  | <11 casualties   | 1.0064   | 0.9938   | 1.0191   | 0.3203  |
| 61                  | >=11 casualties  | 1.0572   | 1.0035   | 1.1139   | 0.0365  |
| 61                  | <11 casualties   | 1.0066   | 0.9939   | 1.0195   | 0.3087  |
| 62                  | >=11 casualties  | 1.0519   | 0.9991   | 1.1074   | 0.0540  |
| 62                  | <11 casualties   | 1.0071   | 0.9945   | 1.0199   | 0.2712  |
| 63                  | >=11 casualties  | 1.0468   | 0.9957   | 1.1005   | 0.0733  |
| 63                  | <11 casualties   | 1.0087   | 0.9959   | 1.0215   | 0.1827  |
| 64                  | >=11 casualties  | 1.0464   | 0.9955   | 1.0999   | 0.0748  |

Continued on next page

Supplementary Table 5 – continued from previous page

| Days after violence | Type of violence | Estimate | CI lower | CI upper | p-value |
|---------------------|------------------|----------|----------|----------|---------|
| 64                  | <11 casualties   | 1.0097   | 0.9973   | 1.0223   | 0.1264  |
| 65                  | >=11 casualties  | 1.0465   | 0.9958   | 1.0998   | 0.0730  |
| 65                  | <11 casualties   | 1.0104   | 0.9981   | 1.0229   | 0.0964  |
| 66                  | >=11 casualties  | 1.0427   | 0.9921   | 1.0958   | 0.0997  |
| 66                  | <11 casualties   | 1.0115   | 0.9996   | 1.0237   | 0.0590  |
| 67                  | >=11 casualties  | 1.0436   | 0.9925   | 1.0972   | 0.0954  |
| 67                  | <11 casualties   | 1.0115   | 0.9994   | 1.0238   | 0.0631  |
| 68                  | >=11 casualties  | 1.0418   | 0.9900   | 1.0962   | 0.1155  |
| 68                  | <11 casualties   | 1.0105   | 0.9984   | 1.0227   | 0.0898  |
| 69                  | >=11 casualties  | 1.0435   | 0.9912   | 1.0986   | 0.1047  |
| 69                  | <11 casualties   | 1.0099   | 0.9978   | 1.0222   | 0.1098  |
| 70                  | >=11 casualties  | 1.0261   | 0.9724   | 1.0828   | 0.3471  |
| 70                  | <11 casualties   | 1.0090   | 0.9964   | 1.0219   | 0.1622  |
| 71                  | >=11 casualties  | 1.0265   | 0.9733   | 1.0825   | 0.3357  |
| 71                  | <11 casualties   | 1.0095   | 0.9968   | 1.0223   | 0.1431  |
| 72                  | >=11 casualties  | 1.0222   | 0.9695   | 1.0778   | 0.4158  |
| 72                  | <11 casualties   | 1.0097   | 0.9970   | 1.0226   | 0.1339  |
| 73                  | >=11 casualties  | 1.0235   | 0.9718   | 1.0779   | 0.3793  |
| 73                  | <11 casualties   | 1.0093   | 0.9967   | 1.0221   | 0.1472  |
| 74                  | >=11 casualties  | 1.0234   | 0.9713   | 1.0784   | 0.3858  |
| 74                  | <11 casualties   | 1.0092   | 0.9966   | 1.0220   | 0.1526  |
| 75                  | >=11 casualties  | 1.0257   | 0.9729   | 1.0812   | 0.3466  |
| 75                  | <11 casualties   | 1.0100   | 0.9976   | 1.0225   | 0.1155  |
| 76                  | >=11 casualties  | 1.0278   | 0.9755   | 1.0829   | 0.3028  |
| 76                  | <11 casualties   | 1.0093   | 0.9969   | 1.0218   | 0.1415  |
| 77                  | >=11 casualties  | 1.0309   | 0.9789   | 1.0856   | 0.2497  |
| 77                  | <11 casualties   | 1.0088   | 0.9962   | 1.0215   | 0.1712  |
| 78                  | >=11 casualties  | 1.0340   | 0.9815   | 1.0893   | 0.2085  |
| 78                  | <11 casualties   | 1.0095   | 0.9969   | 1.0222   | 0.1398  |
| 79                  | >=11 casualties  | 1.0383   | 0.9840   | 1.0956   | 0.1702  |
| 79                  | <11 casualties   | 1.0094   | 0.9971   | 1.0219   | 0.1356  |
| 80                  | >=11 casualties  | 1.0444   | 0.9900   | 1.1018   | 0.1114  |

Continued on next page

Supplementary Table 5 – continued from previous page

| Days after violence | Type of violence | Estimate | CI lower | CI upper | p-value |
|---------------------|------------------|----------|----------|----------|---------|
| 80                  | <11 casualties   | 1.0107   | 0.9983   | 1.0232   | 0.0908  |
| 81                  | >=11 casualties  | 1.0473   | 0.9919   | 1.1058   | 0.0958  |
| 81                  | <11 casualties   | 1.0105   | 0.9981   | 1.0231   | 0.0976  |
| 82                  | >=11 casualties  | 1.0499   | 0.9947   | 1.1081   | 0.0774  |
| 82                  | <11 casualties   | 1.0117   | 0.9994   | 1.0242   | 0.0617  |
| 83                  | >=11 casualties  | 1.0517   | 0.9955   | 1.1110   | 0.0718  |
| 83                  | <11 casualties   | 1.0121   | 0.9998   | 1.0245   | 0.0531  |
| 84                  | >=11 casualties  | 1.0531   | 0.9977   | 1.1116   | 0.0607  |
| 84                  | <11 casualties   | 1.0124   | 1.0001   | 1.0247   | 0.0474  |
| 85                  | >=11 casualties  | 1.0548   | 1.0000   | 1.1127   | 0.0500  |
| 85                  | <11 casualties   | 1.0138   | 1.0009   | 1.0269   | 0.0355  |
| 86                  | >=11 casualties  | 1.0555   | 1.0004   | 1.1136   | 0.0484  |
| 86                  | <11 casualties   | 1.0135   | 1.0005   | 1.0267   | 0.0418  |
| 87                  | >=11 casualties  | 1.0553   | 1.0007   | 1.1129   | 0.0469  |
| 87                  | <11 casualties   | 1.0126   | 0.9998   | 1.0255   | 0.0532  |
| 88                  | >=11 casualties  | 1.0555   | 1.0017   | 1.1122   | 0.0429  |
| 88                  | <11 casualties   | 1.0135   | 1.0009   | 1.0263   | 0.0358  |
| 89                  | >=11 casualties  | 1.0553   | 1.0013   | 1.1122   | 0.0446  |
| 89                  | <11 casualties   | 1.0131   | 1.0004   | 1.0259   | 0.0440  |
| 90                  | >=11 casualties  | 1.0541   | 1.0025   | 1.1084   | 0.0395  |
| 90                  | <11 casualties   | 1.0131   | 1.0002   | 1.0261   | 0.0470  |
| 91                  | >=11 casualties  | 1.0526   | 1.0025   | 1.1052   | 0.0392  |
| 91                  | <11 casualties   | 1.0121   | 0.9996   | 1.0247   | 0.0588  |
| 92                  | >=11 casualties  | 1.0516   | 1.0020   | 1.1036   | 0.0413  |
| 92                  | <11 casualties   | 1.0124   | 1.0001   | 1.0250   | 0.0489  |
| 93                  | >=11 casualties  | 1.0513   | 1.0024   | 1.1025   | 0.0393  |
| 93                  | <11 casualties   | 1.0113   | 0.9985   | 1.0243   | 0.0833  |
| 94                  | >=11 casualties  | 1.0534   | 1.0041   | 1.1050   | 0.0332  |
| 94                  | <11 casualties   | 1.0122   | 0.9994   | 1.0252   | 0.0621  |
| 95                  | >=11 casualties  | 1.0528   | 1.0032   | 1.1049   | 0.0365  |
| 95                  | <11 casualties   | 1.0114   | 0.9987   | 1.0243   | 0.0791  |
| 96                  | >=11 casualties  | 1.0505   | 1.0015   | 1.1020   | 0.0431  |

Continued on next page

Supplementary Table 5 – continued from previous page

| Days after violence | Type of violence | Estimate | CI lower | CI upper | p-value |
|---------------------|------------------|----------|----------|----------|---------|
| 96                  | <11 casualties   | 1.0118   | 0.9990   | 1.0248   | 0.0719  |
| 97                  | >=11 casualties  | 1.0509   | 1.0015   | 1.1026   | 0.0432  |
| 97                  | <11 casualties   | 1.0133   | 1.0003   | 1.0265   | 0.0451  |
| 98                  | >=11 casualties  | 1.0449   | 1.0000   | 1.0919   | 0.0499  |
| 98                  | <11 casualties   | 1.0126   | 0.9992   | 1.0261   | 0.0648  |
| 99                  | >=11 casualties  | 1.0441   | 0.9994   | 1.0908   | 0.0533  |
| 99                  | <11 casualties   | 1.0127   | 0.9992   | 1.0264   | 0.0649  |
| 100                 | >=11 casualties  | 1.0447   | 1.0000   | 1.0914   | 0.0497  |
| 100                 | <11 casualties   | 1.0134   | 1.0001   | 1.0270   | 0.0487  |
| 101                 | >=11 casualties  | 1.0472   | 1.0030   | 1.0934   | 0.0359  |
| 101                 | <11 casualties   | 1.0137   | 1.0002   | 1.0274   | 0.0473  |
| 102                 | >=11 casualties  | 1.0511   | 1.0052   | 1.0990   | 0.0287  |
| 102                 | <11 casualties   | 1.0124   | 0.9984   | 1.0265   | 0.0824  |
| 103                 | >=11 casualties  | 1.0487   | 1.0035   | 1.0960   | 0.0345  |
| 103                 | <11 casualties   | 1.0124   | 0.9980   | 1.0269   | 0.0909  |
| 104                 | >=11 casualties  | 1.0499   | 1.0050   | 1.0968   | 0.0289  |
| 104                 | <11 casualties   | 1.0120   | 0.9976   | 1.0265   | 0.1019  |
| 105                 | >=11 casualties  | 1.0476   | 1.0022   | 1.0950   | 0.0395  |
| 105                 | <11 casualties   | 1.0128   | 0.9984   | 1.0275   | 0.0817  |
| 106                 | >=11 casualties  | 1.0478   | 1.0024   | 1.0954   | 0.0390  |
| 106                 | <11 casualties   | 1.0129   | 0.9984   | 1.0276   | 0.0807  |
| 107                 | >=11 casualties  | 1.0481   | 1.0028   | 1.0954   | 0.0371  |
| 107                 | <11 casualties   | 1.0126   | 0.9983   | 1.0271   | 0.0853  |
| 108                 | >=11 casualties  | 1.0454   | 1.0016   | 1.0910   | 0.0418  |
| 108                 | <11 casualties   | 1.0121   | 0.9981   | 1.0263   | 0.0896  |
| 109                 | >=11 casualties  | 1.0450   | 1.0011   | 1.0908   | 0.0443  |
| 109                 | <11 casualties   | 1.0123   | 0.9981   | 1.0268   | 0.0903  |
| 110                 | >=11 casualties  | 1.0438   | 1.0000   | 1.0896   | 0.0500  |
| 110                 | <11 casualties   | 1.0147   | 1.0004   | 1.0292   | 0.0434  |
| 111                 | >=11 casualties  | 1.0463   | 1.0016   | 1.0930   | 0.0423  |
| 111                 | <11 casualties   | 1.0153   | 1.0011   | 1.0297   | 0.0345  |
| 112                 | >=11 casualties  | 1.0395   | 0.9984   | 1.0823   | 0.0601  |

Continued on next page



Supplementary Table 5 – continued from previous page

| Days after violence | Type of violence | Estimate | CI lower | CI upper | p-value |
|---------------------|------------------|----------|----------|----------|---------|
| 112                 | <11 casualties   | 1.0139   | 0.9996   | 1.0284   | 0.0566  |
| 113                 | >=11 casualties  | 1.0404   | 0.9994   | 1.0831   | 0.0536  |
| 113                 | <11 casualties   | 1.0132   | 0.9989   | 1.0276   | 0.0705  |
| 114                 | >=11 casualties  | 1.0433   | 1.0025   | 1.0857   | 0.0371  |
| 114                 | <11 casualties   | 1.0123   | 0.9977   | 1.0270   | 0.0983  |
| 115                 | >=11 casualties  | 1.0411   | 0.9999   | 1.0841   | 0.0507  |
| 115                 | <11 casualties   | 1.0124   | 0.9977   | 1.0274   | 0.0996  |
| 116                 | >=11 casualties  | 1.0389   | 0.9984   | 1.0810   | 0.0601  |
| 116                 | <11 casualties   | 1.0130   | 0.9981   | 1.0280   | 0.0872  |
| 117                 | >=11 casualties  | 1.0379   | 0.9971   | 1.0804   | 0.0693  |
| 117                 | <11 casualties   | 1.0121   | 0.9978   | 1.0266   | 0.0978  |
| 118                 | >=11 casualties  | 1.0359   | 0.9951   | 1.0784   | 0.0855  |
| 118                 | <11 casualties   | 1.0112   | 0.9970   | 1.0257   | 0.1226  |
| 119                 | >=11 casualties  | 1.0359   | 0.9955   | 1.0780   | 0.0826  |
| 119                 | <11 casualties   | 1.0104   | 0.9961   | 1.0249   | 0.1557  |
| 120                 | >=11 casualties  | 1.0360   | 0.9951   | 1.0787   | 0.0853  |
| 120                 | <11 casualties   | 1.0122   | 0.9978   | 1.0269   | 0.0978  |

Supplementary Table 6: Full model results for Figure 3c.

| Days after violence | Type of violence              | Estimate | CI lower | CI upper | p-value |
|---------------------|-------------------------------|----------|----------|----------|---------|
| 1                   | >=60 days since last violence | 0.9992   | 0.9548   | 1.0457   | 0.9732  |
| 1                   | <60 days since last violence  | 1.0354   | 1.0109   | 1.0605   | 0.0045  |
| 2                   | >=60 days since last violence | 1.0032   | 0.9680   | 1.0396   | 0.8620  |
| 2                   | <60 days since last violence  | 1.0269   | 1.0041   | 1.0503   | 0.0205  |
| 3                   | >=60 days since last violence | 1.0135   | 0.9788   | 1.0495   | 0.4506  |
| 3                   | <60 days since last violence  | 1.0363   | 1.0166   | 1.0565   | 0.0003  |
| 4                   | >=60 days since last violence | 1.0158   | 0.9848   | 1.0477   | 0.3206  |
| 4                   | <60 days since last violence  | 1.0424   | 1.0243   | 1.0607   | 0.0000  |
| 5                   | >=60 days since last violence | 1.0005   | 0.9703   | 1.0316   | 0.9754  |
| 5                   | <60 days since last violence  | 1.0445   | 1.0260   | 1.0633   | 0.0000  |
| 6                   | >=60 days since last violence | 1.0063   | 0.9768   | 1.0366   | 0.6801  |
| 6                   | <60 days since last violence  | 1.0456   | 1.0259   | 1.0655   | 0.0000  |
| 7                   | >=60 days since last violence | 1.0016   | 0.9740   | 1.0300   | 0.9099  |
| 7                   | <60 days since last violence  | 1.0494   | 1.0299   | 1.0693   | 0.0000  |
| 8                   | >=60 days since last violence | 1.0093   | 0.9826   | 1.0368   | 0.4973  |
| 8                   | <60 days since last violence  | 1.0473   | 1.0287   | 1.0662   | 0.0000  |
| 9                   | >=60 days since last violence | 1.0118   | 0.9855   | 1.0388   | 0.3827  |
| 9                   | <60 days since last violence  | 1.0471   | 1.0287   | 1.0658   | 0.0000  |
| 10                  | >=60 days since last violence | 1.0120   | 0.9860   | 1.0386   | 0.3689  |
| 10                  | <60 days since last violence  | 1.0465   | 1.0287   | 1.0645   | 0.0000  |
| 11                  | >=60 days since last violence | 1.0099   | 0.9823   | 1.0383   | 0.4850  |
| 11                  | <60 days since last violence  | 1.0457   | 1.0279   | 1.0638   | 0.0000  |
| 12                  | >=60 days since last violence | 1.0071   | 0.9799   | 1.0350   | 0.6140  |
| 12                  | <60 days since last violence  | 1.0432   | 1.0252   | 1.0615   | 0.0000  |
| 13                  | >=60 days since last violence | 1.0077   | 0.9806   | 1.0356   | 0.5800  |
| 13                  | <60 days since last violence  | 1.0386   | 1.0219   | 1.0555   | 0.0000  |
| 14                  | >=60 days since last violence | 1.0087   | 0.9811   | 1.0372   | 0.5400  |
| 14                  | <60 days since last violence  | 1.0374   | 1.0208   | 1.0544   | 0.0000  |
| 15                  | >=60 days since last violence | 1.0087   | 0.9816   | 1.0366   | 0.5332  |
| 15                  | <60 days since last violence  | 1.0356   | 1.0189   | 1.0526   | 0.0000  |
| 16                  | >=60 days since last violence | 1.0066   | 0.9794   | 1.0344   | 0.6394  |

Continued on next page

Supplementary Table 6 – continued from previous page

| Days after violence | Type of violence              | Estimate | CI lower | CI upper | p-value |
|---------------------|-------------------------------|----------|----------|----------|---------|
| 16                  | <60 days since last violence  | 1.0344   | 1.0173   | 1.0518   | 0.0001  |
| 17                  | >=60 days since last violence | 1.0053   | 0.9785   | 1.0329   | 0.7011  |
| 17                  | <60 days since last violence  | 1.0321   | 1.0144   | 1.0501   | 0.0003  |
| 18                  | >=60 days since last violence | 1.0054   | 0.9786   | 1.0330   | 0.6948  |
| 18                  | <60 days since last violence  | 1.0315   | 1.0137   | 1.0497   | 0.0005  |
| 19                  | >=60 days since last violence | 1.0075   | 0.9811   | 1.0347   | 0.5809  |
| 19                  | <60 days since last violence  | 1.0308   | 1.0132   | 1.0487   | 0.0006  |
| 20                  | >=60 days since last violence | 1.0066   | 0.9800   | 1.0340   | 0.6294  |
| 20                  | <60 days since last violence  | 1.0278   | 1.0097   | 1.0463   | 0.0025  |
| 21                  | >=60 days since last violence | 1.0046   | 0.9778   | 1.0322   | 0.7387  |
| 21                  | <60 days since last violence  | 1.0275   | 1.0095   | 1.0458   | 0.0026  |
| 22                  | >=60 days since last violence | 1.0050   | 0.9784   | 1.0324   | 0.7147  |
| 22                  | <60 days since last violence  | 1.0267   | 1.0086   | 1.0451   | 0.0037  |
| 23                  | >=60 days since last violence | 1.0045   | 0.9771   | 1.0327   | 0.7491  |
| 23                  | <60 days since last violence  | 1.0266   | 1.0092   | 1.0442   | 0.0026  |
| 24                  | >=60 days since last violence | 1.0044   | 0.9768   | 1.0328   | 0.7554  |
| 24                  | <60 days since last violence  | 1.0237   | 1.0068   | 1.0408   | 0.0057  |
| 25                  | >=60 days since last violence | 1.0095   | 0.9823   | 1.0375   | 0.4984  |
| 25                  | <60 days since last violence  | 1.0216   | 1.0049   | 1.0386   | 0.0111  |
| 26                  | >=60 days since last violence | 1.0071   | 0.9793   | 1.0357   | 0.6207  |
| 26                  | <60 days since last violence  | 1.0203   | 1.0030   | 1.0378   | 0.0210  |
| 27                  | >=60 days since last violence | 1.0091   | 0.9821   | 1.0369   | 0.5112  |
| 27                  | <60 days since last violence  | 1.0196   | 1.0028   | 1.0366   | 0.0219  |
| 28                  | >=60 days since last violence | 1.0058   | 0.9786   | 1.0338   | 0.6789  |
| 28                  | <60 days since last violence  | 1.0186   | 1.0023   | 1.0352   | 0.0253  |
| 29                  | >=60 days since last violence | 1.0044   | 0.9764   | 1.0332   | 0.7593  |
| 29                  | <60 days since last violence  | 1.0204   | 1.0043   | 1.0367   | 0.0127  |
| 30                  | >=60 days since last violence | 1.0059   | 0.9778   | 1.0348   | 0.6823  |
| 30                  | <60 days since last violence  | 1.0211   | 1.0048   | 1.0377   | 0.0111  |
| 31                  | >=60 days since last violence | 1.0045   | 0.9752   | 1.0346   | 0.7682  |
| 31                  | <60 days since last violence  | 1.0227   | 1.0064   | 1.0393   | 0.0063  |
| 32                  | >=60 days since last violence | 1.0048   | 0.9760   | 1.0343   | 0.7488  |

Continued on next page

Supplementary Table 6 – continued from previous page

| Days after violence | Type of violence              | Estimate | CI lower | CI upper | p-value |
|---------------------|-------------------------------|----------|----------|----------|---------|
| 32                  | <60 days since last violence  | 1.0254   | 1.0091   | 1.0420   | 0.0021  |
| 33                  | >=60 days since last violence | 1.0044   | 0.9752   | 1.0345   | 0.7692  |
| 33                  | <60 days since last violence  | 1.0271   | 1.0111   | 1.0434   | 0.0009  |
| 34                  | >=60 days since last violence | 1.0066   | 0.9772   | 1.0370   | 0.6626  |
| 34                  | <60 days since last violence  | 1.0277   | 1.0119   | 1.0437   | 0.0005  |
| 35                  | >=60 days since last violence | 1.0039   | 0.9746   | 1.0340   | 0.7976  |
| 35                  | <60 days since last violence  | 1.0292   | 1.0132   | 1.0454   | 0.0003  |
| 36                  | >=60 days since last violence | 0.9984   | 0.9681   | 1.0296   | 0.9180  |
| 36                  | <60 days since last violence  | 1.0306   | 1.0154   | 1.0461   | 0.0001  |
| 37                  | >=60 days since last violence | 0.9997   | 0.9707   | 1.0296   | 0.9824  |
| 37                  | <60 days since last violence  | 1.0305   | 1.0153   | 1.0459   | 0.0001  |
| 38                  | >=60 days since last violence | 0.9995   | 0.9709   | 1.0288   | 0.9711  |
| 38                  | <60 days since last violence  | 1.0287   | 1.0134   | 1.0442   | 0.0002  |
| 39                  | >=60 days since last violence | 0.9994   | 0.9707   | 1.0289   | 0.9658  |
| 39                  | <60 days since last violence  | 1.0283   | 1.0131   | 1.0437   | 0.0002  |
| 40                  | >=60 days since last violence | 0.9971   | 0.9689   | 1.0261   | 0.8422  |
| 40                  | <60 days since last violence  | 1.0286   | 1.0138   | 1.0436   | 0.0001  |
| 41                  | >=60 days since last violence | 0.9962   | 0.9679   | 1.0253   | 0.7954  |
| 41                  | <60 days since last violence  | 1.0293   | 1.0138   | 1.0450   | 0.0002  |
| 42                  | >=60 days since last violence | 0.9954   | 0.9671   | 1.0245   | 0.7519  |
| 42                  | <60 days since last violence  | 1.0278   | 1.0123   | 1.0436   | 0.0004  |
| 43                  | >=60 days since last violence | 0.9956   | 0.9674   | 1.0247   | 0.7662  |
| 43                  | <60 days since last violence  | 1.0267   | 1.0115   | 1.0422   | 0.0005  |
| 44                  | >=60 days since last violence | 0.9932   | 0.9650   | 1.0222   | 0.6413  |
| 44                  | <60 days since last violence  | 1.0258   | 1.0105   | 1.0414   | 0.0009  |
| 45                  | >=60 days since last violence | 0.9920   | 0.9639   | 1.0209   | 0.5851  |
| 45                  | <60 days since last violence  | 1.0257   | 1.0102   | 1.0414   | 0.0011  |
| 46                  | >=60 days since last violence | 0.9924   | 0.9643   | 1.0213   | 0.6020  |
| 46                  | <60 days since last violence  | 1.0243   | 1.0089   | 1.0399   | 0.0019  |
| 47                  | >=60 days since last violence | 0.9902   | 0.9616   | 1.0196   | 0.5093  |
| 47                  | <60 days since last violence  | 1.0249   | 1.0094   | 1.0407   | 0.0016  |
| 48                  | >=60 days since last violence | 0.9887   | 0.9588   | 1.0195   | 0.4673  |

Continued on next page

Supplementary Table 6 – continued from previous page

| Days after violence | Type of violence              | Estimate | CI lower | CI upper | p-value |
|---------------------|-------------------------------|----------|----------|----------|---------|
| 48                  | <60 days since last violence  | 1.0252   | 1.0097   | 1.0409   | 0.0014  |
| 49                  | >=60 days since last violence | 0.9875   | 0.9575   | 1.0185   | 0.4247  |
| 49                  | <60 days since last violence  | 1.0226   | 1.0076   | 1.0378   | 0.0030  |
| 50                  | >=60 days since last violence | 0.9882   | 0.9588   | 1.0185   | 0.4416  |
| 50                  | <60 days since last violence  | 1.0228   | 1.0078   | 1.0382   | 0.0029  |
| 51                  | >=60 days since last violence | 0.9875   | 0.9580   | 1.0180   | 0.4180  |
| 51                  | <60 days since last violence  | 1.0234   | 1.0079   | 1.0391   | 0.0029  |
| 52                  | >=60 days since last violence | 0.9891   | 0.9594   | 1.0198   | 0.4816  |
| 52                  | <60 days since last violence  | 1.0222   | 1.0068   | 1.0379   | 0.0046  |
| 53                  | >=60 days since last violence | 0.9903   | 0.9614   | 1.0200   | 0.5172  |
| 53                  | <60 days since last violence  | 1.0228   | 1.0072   | 1.0386   | 0.0039  |
| 54                  | >=60 days since last violence | 0.9895   | 0.9612   | 1.0187   | 0.4782  |
| 54                  | <60 days since last violence  | 1.0218   | 1.0062   | 1.0377   | 0.0061  |
| 55                  | >=60 days since last violence | 0.9895   | 0.9605   | 1.0193   | 0.4849  |
| 55                  | <60 days since last violence  | 1.0207   | 1.0048   | 1.0369   | 0.0105  |
| 56                  | >=60 days since last violence | 0.9864   | 0.9572   | 1.0164   | 0.3701  |
| 56                  | <60 days since last violence  | 1.0212   | 1.0049   | 1.0377   | 0.0106  |
| 57                  | >=60 days since last violence | 0.9853   | 0.9559   | 1.0156   | 0.3369  |
| 57                  | <60 days since last violence  | 1.0218   | 1.0056   | 1.0383   | 0.0080  |
| 58                  | >=60 days since last violence | 0.9857   | 0.9564   | 1.0160   | 0.3513  |
| 58                  | <60 days since last violence  | 1.0217   | 1.0059   | 1.0378   | 0.0070  |
| 59                  | >=60 days since last violence | 0.9848   | 0.9556   | 1.0148   | 0.3169  |
| 59                  | <60 days since last violence  | 1.0217   | 1.0056   | 1.0381   | 0.0082  |
| 60                  | >=60 days since last violence | 0.9851   | 0.9560   | 1.0152   | 0.3281  |
| 60                  | <60 days since last violence  | 1.0198   | 1.0038   | 1.0361   | 0.0153  |
| 61                  | >=60 days since last violence | 0.9854   | 0.9557   | 1.0161   | 0.3483  |
| 61                  | <60 days since last violence  | 1.0196   | 1.0034   | 1.0361   | 0.0174  |
| 62                  | >=60 days since last violence | 0.9858   | 0.9560   | 1.0166   | 0.3631  |
| 62                  | <60 days since last violence  | 1.0190   | 1.0035   | 1.0347   | 0.0159  |
| 63                  | >=60 days since last violence | 0.9854   | 0.9545   | 1.0173   | 0.3653  |
| 63                  | <60 days since last violence  | 1.0202   | 1.0054   | 1.0352   | 0.0073  |
| 64                  | >=60 days since last violence | 0.9872   | 0.9559   | 1.0196   | 0.4345  |

Continued on next page

Supplementary Table 6 – continued from previous page

| Days after violence | Type of violence              | Estimate | CI lower | CI upper | p-value |
|---------------------|-------------------------------|----------|----------|----------|---------|
| 64                  | <60 days since last violence  | 1.0204   | 1.0059   | 1.0352   | 0.0057  |
| 65                  | >=60 days since last violence | 0.9879   | 0.9561   | 1.0208   | 0.4660  |
| 65                  | <60 days since last violence  | 1.0209   | 1.0064   | 1.0356   | 0.0047  |
| 66                  | >=60 days since last violence | 0.9905   | 0.9593   | 1.0227   | 0.5584  |
| 66                  | <60 days since last violence  | 1.0205   | 1.0062   | 1.0349   | 0.0047  |
| 67                  | >=60 days since last violence | 0.9893   | 0.9580   | 1.0216   | 0.5110  |
| 67                  | <60 days since last violence  | 1.0210   | 1.0066   | 1.0356   | 0.0042  |
| 68                  | >=60 days since last violence | 0.9894   | 0.9581   | 1.0217   | 0.5155  |
| 68                  | <60 days since last violence  | 1.0189   | 1.0040   | 1.0340   | 0.0129  |
| 69                  | >=60 days since last violence | 0.9900   | 0.9587   | 1.0223   | 0.5403  |
| 69                  | <60 days since last violence  | 1.0178   | 1.0026   | 1.0333   | 0.0217  |
| 70                  | >=60 days since last violence | 0.9874   | 0.9562   | 1.0197   | 0.4397  |
| 70                  | <60 days since last violence  | 1.0155   | 1.0000   | 1.0312   | 0.0504  |
| 71                  | >=60 days since last violence | 0.9874   | 0.9561   | 1.0197   | 0.4405  |
| 71                  | <60 days since last violence  | 1.0160   | 1.0009   | 1.0313   | 0.0377  |
| 72                  | >=60 days since last violence | 0.9881   | 0.9569   | 1.0204   | 0.4660  |
| 72                  | <60 days since last violence  | 1.0152   | 1.0006   | 1.0300   | 0.0411  |
| 73                  | >=60 days since last violence | 0.9883   | 0.9571   | 1.0205   | 0.4716  |
| 73                  | <60 days since last violence  | 1.0149   | 1.0005   | 1.0296   | 0.0430  |
| 74                  | >=60 days since last violence | 0.9870   | 0.9555   | 1.0195   | 0.4278  |
| 74                  | <60 days since last violence  | 1.0154   | 1.0014   | 1.0297   | 0.0310  |
| 75                  | >=60 days since last violence | 0.9863   | 0.9546   | 1.0191   | 0.4099  |
| 75                  | <60 days since last violence  | 1.0171   | 1.0031   | 1.0313   | 0.0165  |
| 76                  | >=60 days since last violence | 0.9863   | 0.9544   | 1.0191   | 0.4082  |
| 76                  | <60 days since last violence  | 1.0166   | 1.0030   | 1.0305   | 0.0168  |
| 77                  | >=60 days since last violence | 0.9868   | 0.9548   | 1.0200   | 0.4320  |
| 77                  | <60 days since last violence  | 1.0164   | 1.0029   | 1.0301   | 0.0174  |
| 78                  | >=60 days since last violence | 0.9873   | 0.9551   | 1.0205   | 0.4487  |
| 78                  | <60 days since last violence  | 1.0177   | 1.0038   | 1.0318   | 0.0124  |
| 79                  | >=60 days since last violence | 0.9883   | 0.9559   | 1.0218   | 0.4888  |
| 79                  | <60 days since last violence  | 1.0180   | 1.0043   | 1.0319   | 0.0097  |
| 80                  | >=60 days since last violence | 0.9897   | 0.9575   | 1.0229   | 0.5369  |

Continued on next page

Supplementary Table 6 – continued from previous page

| Days after violence | Type of violence              | Estimate | CI lower | CI upper | p-value |
|---------------------|-------------------------------|----------|----------|----------|---------|
| 80                  | <60 days since last violence  | 1.0200   | 1.0068   | 1.0333   | 0.0028  |
| 81                  | >=60 days since last violence | 0.9898   | 0.9574   | 1.0232   | 0.5432  |
| 81                  | <60 days since last violence  | 1.0200   | 1.0069   | 1.0332   | 0.0027  |
| 82                  | >=60 days since last violence | 0.9917   | 0.9594   | 1.0250   | 0.6201  |
| 82                  | <60 days since last violence  | 1.0210   | 1.0078   | 1.0342   | 0.0017  |
| 83                  | >=60 days since last violence | 0.9913   | 0.9594   | 1.0242   | 0.5980  |
| 83                  | <60 days since last violence  | 1.0219   | 1.0084   | 1.0356   | 0.0014  |
| 84                  | >=60 days since last violence | 0.9926   | 0.9607   | 1.0256   | 0.6560  |
| 84                  | <60 days since last violence  | 1.0218   | 1.0082   | 1.0357   | 0.0017  |
| 85                  | >=60 days since last violence | 0.9936   | 0.9618   | 1.0264   | 0.6966  |
| 85                  | <60 days since last violence  | 1.0236   | 1.0091   | 1.0383   | 0.0013  |
| 86                  | >=60 days since last violence | 0.9932   | 0.9613   | 1.0262   | 0.6843  |
| 86                  | <60 days since last violence  | 1.0234   | 1.0090   | 1.0381   | 0.0014  |
| 87                  | >=60 days since last violence | 0.9915   | 0.9594   | 1.0246   | 0.6091  |
| 87                  | <60 days since last violence  | 1.0233   | 1.0093   | 1.0376   | 0.0011  |
| 88                  | >=60 days since last violence | 0.9925   | 0.9601   | 1.0259   | 0.6556  |
| 88                  | <60 days since last violence  | 1.0241   | 1.0103   | 1.0381   | 0.0006  |
| 89                  | >=60 days since last violence | 0.9915   | 0.9591   | 1.0250   | 0.6147  |
| 89                  | <60 days since last violence  | 1.0238   | 1.0100   | 1.0378   | 0.0007  |
| 90                  | >=60 days since last violence | 0.9919   | 0.9598   | 1.0252   | 0.6306  |
| 90                  | <60 days since last violence  | 1.0236   | 1.0103   | 1.0371   | 0.0005  |
| 91                  | >=60 days since last violence | 0.9930   | 0.9607   | 1.0264   | 0.6786  |
| 91                  | <60 days since last violence  | 1.0216   | 1.0085   | 1.0349   | 0.0012  |
| 92                  | >=60 days since last violence | 0.9929   | 0.9602   | 1.0268   | 0.6779  |
| 92                  | <60 days since last violence  | 1.0218   | 1.0088   | 1.0351   | 0.0010  |
| 93                  | >=60 days since last violence | 0.9928   | 0.9598   | 1.0270   | 0.6770  |
| 93                  | <60 days since last violence  | 1.0204   | 1.0076   | 1.0334   | 0.0017  |
| 94                  | >=60 days since last violence | 0.9942   | 0.9610   | 1.0285   | 0.7356  |
| 94                  | <60 days since last violence  | 1.0212   | 1.0081   | 1.0345   | 0.0014  |
| 95                  | >=60 days since last violence | 0.9924   | 0.9591   | 1.0270   | 0.6638  |
| 95                  | <60 days since last violence  | 1.0210   | 1.0079   | 1.0342   | 0.0016  |
| 96                  | >=60 days since last violence | 0.9923   | 0.9585   | 1.0273   | 0.6621  |

Continued on next page

Supplementary Table 6 – continued from previous page

| Days after violence | Type of violence              | Estimate | CI lower | CI upper | p-value |
|---------------------|-------------------------------|----------|----------|----------|---------|
| 96                  | <60 days since last violence  | 1.0212   | 1.0081   | 1.0344   | 0.0014  |
| 97                  | >=60 days since last violence | 0.9934   | 0.9592   | 1.0289   | 0.7120  |
| 97                  | <60 days since last violence  | 1.0225   | 1.0093   | 1.0360   | 0.0008  |
| 98                  | >=60 days since last violence | 0.9906   | 0.9556   | 1.0269   | 0.6078  |
| 98                  | <60 days since last violence  | 1.0220   | 1.0089   | 1.0354   | 0.0010  |
| 99                  | >=60 days since last violence | 0.9901   | 0.9547   | 1.0269   | 0.5938  |
| 99                  | <60 days since last violence  | 1.0223   | 1.0092   | 1.0356   | 0.0008  |
| 100                 | >=60 days since last violence | 0.9886   | 0.9531   | 1.0255   | 0.5395  |
| 100                 | <60 days since last violence  | 1.0241   | 1.0107   | 1.0377   | 0.0004  |
| 101                 | >=60 days since last violence | 0.9896   | 0.9539   | 1.0268   | 0.5796  |
| 101                 | <60 days since last violence  | 1.0243   | 1.0109   | 1.0379   | 0.0004  |
| 102                 | >=60 days since last violence | 0.9886   | 0.9525   | 1.0261   | 0.5462  |
| 102                 | <60 days since last violence  | 1.0235   | 1.0101   | 1.0372   | 0.0006  |
| 103                 | >=60 days since last violence | 0.9875   | 0.9507   | 1.0258   | 0.5186  |
| 103                 | <60 days since last violence  | 1.0239   | 1.0105   | 1.0374   | 0.0004  |
| 104                 | >=60 days since last violence | 0.9880   | 0.9513   | 1.0260   | 0.5305  |
| 104                 | <60 days since last violence  | 1.0235   | 1.0100   | 1.0371   | 0.0006  |
| 105                 | >=60 days since last violence | 0.9887   | 0.9520   | 1.0269   | 0.5577  |
| 105                 | <60 days since last violence  | 1.0238   | 1.0104   | 1.0373   | 0.0004  |
| 106                 | >=60 days since last violence | 0.9892   | 0.9524   | 1.0273   | 0.5731  |
| 106                 | <60 days since last violence  | 1.0237   | 1.0100   | 1.0376   | 0.0007  |
| 107                 | >=60 days since last violence | 0.9887   | 0.9520   | 1.0269   | 0.5581  |
| 107                 | <60 days since last violence  | 1.0237   | 1.0099   | 1.0376   | 0.0007  |
| 108                 | >=60 days since last violence | 0.9887   | 0.9521   | 1.0268   | 0.5566  |
| 108                 | <60 days since last violence  | 1.0227   | 1.0092   | 1.0364   | 0.0010  |
| 109                 | >=60 days since last violence | 0.9898   | 0.9532   | 1.0277   | 0.5921  |
| 109                 | <60 days since last violence  | 1.0225   | 1.0088   | 1.0364   | 0.0012  |
| 110                 | >=60 days since last violence | 0.9921   | 0.9564   | 1.0292   | 0.6718  |
| 110                 | <60 days since last violence  | 1.0245   | 1.0101   | 1.0390   | 0.0008  |
| 111                 | >=60 days since last violence | 0.9932   | 0.9577   | 1.0301   | 0.7140  |
| 111                 | <60 days since last violence  | 1.0254   | 1.0110   | 1.0400   | 0.0005  |
| 112                 | >=60 days since last violence | 0.9933   | 0.9574   | 1.0305   | 0.7193  |

Continued on next page



Supplementary Table 6 – continued from previous page

| Days after violence | Type of violence              | Estimate | CI lower | CI upper | p-value |
|---------------------|-------------------------------|----------|----------|----------|---------|
| 112                 | <60 days since last violence  | 1.0226   | 1.0084   | 1.0371   | 0.0018  |
| 113                 | >=60 days since last violence | 0.9928   | 0.9569   | 1.0300   | 0.6995  |
| 113                 | <60 days since last violence  | 1.0220   | 1.0077   | 1.0365   | 0.0025  |
| 114                 | >=60 days since last violence | 0.9905   | 0.9539   | 1.0285   | 0.6192  |
| 114                 | <60 days since last violence  | 1.0223   | 1.0079   | 1.0370   | 0.0024  |
| 115                 | >=60 days since last violence | 0.9901   | 0.9535   | 1.0282   | 0.6069  |
| 115                 | <60 days since last violence  | 1.0222   | 1.0076   | 1.0371   | 0.0028  |
| 116                 | >=60 days since last violence | 0.9905   | 0.9539   | 1.0285   | 0.6204  |
| 116                 | <60 days since last violence  | 1.0226   | 1.0079   | 1.0376   | 0.0026  |
| 117                 | >=60 days since last violence | 0.9905   | 0.9539   | 1.0285   | 0.6195  |
| 117                 | <60 days since last violence  | 1.0215   | 1.0075   | 1.0356   | 0.0024  |
| 118                 | >=60 days since last violence | 0.9892   | 0.9525   | 1.0273   | 0.5726  |
| 118                 | <60 days since last violence  | 1.0208   | 1.0068   | 1.0350   | 0.0035  |
| 119                 | >=60 days since last violence | 0.9888   | 0.9524   | 1.0267   | 0.5575  |
| 119                 | <60 days since last violence  | 1.0198   | 1.0058   | 1.0340   | 0.0055  |
| 120                 | >=60 days since last violence | 0.9919   | 0.9561   | 1.0290   | 0.6632  |
| 120                 | <60 days since last violence  | 1.0203   | 1.0061   | 1.0348   | 0.0050  |

Supplementary Table 7: Full model results for Figure 3d.

| Days after violence | Type of violence   | Estimate | CI lower | CI upper | p-value |
|---------------------|--------------------|----------|----------|----------|---------|
| 1                   | Provincial capital | 1.0198   | 0.9880   | 1.0527   | 0.2249  |
| 1                   | Non-capital        | 1.0250   | 0.9969   | 1.0539   | 0.0812  |
| 2                   | Provincial capital | 1.0103   | 0.9808   | 1.0407   | 0.4980  |
| 2                   | Non-capital        | 1.0208   | 0.9999   | 1.0421   | 0.0512  |
| 3                   | Provincial capital | 1.0135   | 0.9880   | 1.0396   | 0.3030  |
| 3                   | Non-capital        | 1.0346   | 1.0157   | 1.0538   | 0.0003  |
| 4                   | Provincial capital | 1.0229   | 1.0012   | 1.0451   | 0.0388  |
| 4                   | Non-capital        | 1.0385   | 1.0215   | 1.0558   | 0.0000  |
| 5                   | Provincial capital | 1.0126   | 0.9901   | 1.0355   | 0.2744  |
| 5                   | Non-capital        | 1.0372   | 1.0197   | 1.0551   | 0.0000  |
| 6                   | Provincial capital | 1.0126   | 0.9910   | 1.0346   | 0.2563  |
| 6                   | Non-capital        | 1.0413   | 1.0229   | 1.0600   | 0.0000  |
| 7                   | Provincial capital | 1.0098   | 0.9903   | 1.0296   | 0.3290  |
| 7                   | Non-capital        | 1.0443   | 1.0263   | 1.0627   | 0.0000  |
| 8                   | Provincial capital | 1.0063   | 0.9875   | 1.0255   | 0.5137  |
| 8                   | Non-capital        | 1.0477   | 1.0302   | 1.0655   | 0.0000  |
| 9                   | Provincial capital | 1.0099   | 0.9933   | 1.0268   | 0.2455  |
| 9                   | Non-capital        | 1.0481   | 1.0298   | 1.0666   | 0.0000  |
| 10                  | Provincial capital | 1.0096   | 0.9939   | 1.0255   | 0.2336  |
| 10                  | Non-capital        | 1.0489   | 1.0312   | 1.0669   | 0.0000  |
| 11                  | Provincial capital | 1.0081   | 0.9939   | 1.0225   | 0.2638  |
| 11                  | Non-capital        | 1.0485   | 1.0302   | 1.0672   | 0.0000  |
| 12                  | Provincial capital | 1.0065   | 0.9925   | 1.0206   | 0.3677  |
| 12                  | Non-capital        | 1.0463   | 1.0277   | 1.0652   | 0.0000  |
| 13                  | Provincial capital | 1.0058   | 0.9919   | 1.0198   | 0.4176  |
| 13                  | Non-capital        | 1.0434   | 1.0258   | 1.0613   | 0.0000  |
| 14                  | Provincial capital | 1.0035   | 0.9902   | 1.0170   | 0.6048  |
| 14                  | Non-capital        | 1.0445   | 1.0269   | 1.0624   | 0.0000  |
| 15                  | Provincial capital | 1.0022   | 0.9888   | 1.0157   | 0.7506  |
| 15                  | Non-capital        | 1.0433   | 1.0260   | 1.0610   | 0.0000  |
| 16                  | Provincial capital | 1.0018   | 0.9888   | 1.0150   | 0.7827  |

Continued on next page

Supplementary Table 7 – continued from previous page

| Days after violence | Type of violence   | Estimate | CI lower | CI upper | p-value |
|---------------------|--------------------|----------|----------|----------|---------|
| 16                  | Non-capital        | 1.0414   | 1.0236   | 1.0595   | 0.0000  |
| 17                  | Provincial capital | 1.0004   | 0.9878   | 1.0131   | 0.9552  |
| 17                  | Non-capital        | 1.0394   | 1.0208   | 1.0584   | 0.0000  |
| 18                  | Provincial capital | 1.0000   | 0.9880   | 1.0122   | 0.9956  |
| 18                  | Non-capital        | 1.0395   | 1.0206   | 1.0587   | 0.0000  |
| 19                  | Provincial capital | 0.9995   | 0.9871   | 1.0121   | 0.9395  |
| 19                  | Non-capital        | 1.0404   | 1.0219   | 1.0592   | 0.0000  |
| 20                  | Provincial capital | 0.9998   | 0.9871   | 1.0128   | 0.9805  |
| 20                  | Non-capital        | 1.0369   | 1.0182   | 1.0560   | 0.0001  |
| 21                  | Provincial capital | 0.9995   | 0.9863   | 1.0129   | 0.9446  |
| 21                  | Non-capital        | 1.0359   | 1.0173   | 1.0548   | 0.0001  |
| 22                  | Provincial capital | 0.9956   | 0.9828   | 1.0086   | 0.5039  |
| 22                  | Non-capital        | 1.0363   | 1.0178   | 1.0552   | 0.0001  |
| 23                  | Provincial capital | 0.9955   | 0.9828   | 1.0084   | 0.4950  |
| 23                  | Non-capital        | 1.0355   | 1.0173   | 1.0540   | 0.0001  |
| 24                  | Provincial capital | 0.9949   | 0.9826   | 1.0073   | 0.4199  |
| 24                  | Non-capital        | 1.0329   | 1.0147   | 1.0514   | 0.0004  |
| 25                  | Provincial capital | 0.9948   | 0.9829   | 1.0068   | 0.3929  |
| 25                  | Non-capital        | 1.0335   | 1.0149   | 1.0523   | 0.0004  |
| 26                  | Provincial capital | 0.9940   | 0.9816   | 1.0065   | 0.3435  |
| 26                  | Non-capital        | 1.0314   | 1.0124   | 1.0508   | 0.0011  |
| 27                  | Provincial capital | 0.9950   | 0.9830   | 1.0072   | 0.4220  |
| 27                  | Non-capital        | 1.0314   | 1.0129   | 1.0504   | 0.0008  |
| 28                  | Provincial capital | 0.9956   | 0.9831   | 1.0082   | 0.4898  |
| 28                  | Non-capital        | 1.0288   | 1.0108   | 1.0472   | 0.0017  |
| 29                  | Provincial capital | 0.9963   | 0.9841   | 1.0087   | 0.5586  |
| 29                  | Non-capital        | 1.0293   | 1.0116   | 1.0473   | 0.0011  |
| 30                  | Provincial capital | 0.9974   | 0.9853   | 1.0097   | 0.6809  |
| 30                  | Non-capital        | 1.0300   | 1.0123   | 1.0480   | 0.0008  |
| 31                  | Provincial capital | 0.9982   | 0.9855   | 1.0112   | 0.7891  |
| 31                  | Non-capital        | 1.0304   | 1.0124   | 1.0488   | 0.0009  |
| 32                  | Provincial capital | 0.9977   | 0.9842   | 1.0113   | 0.7370  |

Continued on next page

Supplementary Table 7 – continued from previous page

| Days after violence | Type of violence   | Estimate | CI lower | CI upper | p-value |
|---------------------|--------------------|----------|----------|----------|---------|
| 32                  | Non-capital        | 1.0331   | 1.0152   | 1.0512   | 0.0002  |
| 33                  | Provincial capital | 0.9979   | 0.9839   | 1.0121   | 0.7692  |
| 33                  | Non-capital        | 1.0343   | 1.0167   | 1.0521   | 0.0001  |
| 34                  | Provincial capital | 0.9989   | 0.9847   | 1.0133   | 0.8817  |
| 34                  | Non-capital        | 1.0354   | 1.0183   | 1.0529   | 0.0000  |
| 35                  | Provincial capital | 0.9986   | 0.9841   | 1.0134   | 0.8560  |
| 35                  | Non-capital        | 1.0355   | 1.0183   | 1.0531   | 0.0000  |
| 36                  | Provincial capital | 0.9978   | 0.9834   | 1.0125   | 0.7679  |
| 36                  | Non-capital        | 1.0343   | 1.0172   | 1.0517   | 0.0001  |
| 37                  | Provincial capital | 0.9974   | 0.9829   | 1.0122   | 0.7324  |
| 37                  | Non-capital        | 1.0349   | 1.0182   | 1.0518   | 0.0000  |
| 38                  | Provincial capital | 0.9970   | 0.9827   | 1.0115   | 0.6824  |
| 38                  | Non-capital        | 1.0331   | 1.0167   | 1.0497   | 0.0001  |
| 39                  | Provincial capital | 0.9964   | 0.9829   | 1.0100   | 0.5991  |
| 39                  | Non-capital        | 1.0329   | 1.0167   | 1.0493   | 0.0001  |
| 40                  | Provincial capital | 0.9959   | 0.9829   | 1.0091   | 0.5433  |
| 40                  | Non-capital        | 1.0324   | 1.0168   | 1.0482   | 0.0000  |
| 41                  | Provincial capital | 0.9956   | 0.9827   | 1.0086   | 0.5063  |
| 41                  | Non-capital        | 1.0327   | 1.0169   | 1.0488   | 0.0000  |
| 42                  | Provincial capital | 0.9952   | 0.9825   | 1.0082   | 0.4700  |
| 42                  | Non-capital        | 1.0311   | 1.0151   | 1.0474   | 0.0001  |
| 43                  | Provincial capital | 0.9950   | 0.9823   | 1.0079   | 0.4447  |
| 43                  | Non-capital        | 1.0300   | 1.0141   | 1.0461   | 0.0002  |
| 44                  | Provincial capital | 0.9938   | 0.9820   | 1.0058   | 0.3119  |
| 44                  | Non-capital        | 1.0284   | 1.0126   | 1.0445   | 0.0004  |
| 45                  | Provincial capital | 0.9928   | 0.9818   | 1.0039   | 0.2055  |
| 45                  | Non-capital        | 1.0280   | 1.0120   | 1.0442   | 0.0006  |
| 46                  | Provincial capital | 0.9917   | 0.9812   | 1.0024   | 0.1269  |
| 46                  | Non-capital        | 1.0272   | 1.0112   | 1.0434   | 0.0008  |
| 47                  | Provincial capital | 0.9927   | 0.9826   | 1.0029   | 0.1598  |
| 47                  | Non-capital        | 1.0264   | 1.0109   | 1.0421   | 0.0008  |
| 48                  | Provincial capital | 0.9940   | 0.9842   | 1.0038   | 0.2269  |

Continued on next page

Supplementary Table 7 – continued from previous page

| Days after violence | Type of violence   | Estimate | CI lower | CI upper | p-value |
|---------------------|--------------------|----------|----------|----------|---------|
| 48                  | Non-capital        | 1.0258   | 1.0103   | 1.0416   | 0.0010  |
| 49                  | Provincial capital | 0.9946   | 0.9853   | 1.0040   | 0.2555  |
| 49                  | Non-capital        | 1.0232   | 1.0082   | 1.0385   | 0.0024  |
| 50                  | Provincial capital | 0.9963   | 0.9871   | 1.0055   | 0.4268  |
| 50                  | Non-capital        | 1.0231   | 1.0082   | 1.0382   | 0.0022  |
| 51                  | Provincial capital | 0.9961   | 0.9866   | 1.0056   | 0.4163  |
| 51                  | Non-capital        | 1.0234   | 1.0083   | 1.0386   | 0.0022  |
| 52                  | Provincial capital | 0.9952   | 0.9853   | 1.0052   | 0.3469  |
| 52                  | Non-capital        | 1.0234   | 1.0084   | 1.0387   | 0.0022  |
| 53                  | Provincial capital | 0.9958   | 0.9862   | 1.0055   | 0.3939  |
| 53                  | Non-capital        | 1.0243   | 1.0095   | 1.0393   | 0.0012  |
| 54                  | Provincial capital | 0.9962   | 0.9862   | 1.0063   | 0.4614  |
| 54                  | Non-capital        | 1.0229   | 1.0081   | 1.0380   | 0.0023  |
| 55                  | Provincial capital | 0.9962   | 0.9859   | 1.0066   | 0.4724  |
| 55                  | Non-capital        | 1.0219   | 1.0069   | 1.0371   | 0.0040  |
| 56                  | Provincial capital | 0.9952   | 0.9845   | 1.0059   | 0.3767  |
| 56                  | Non-capital        | 1.0212   | 1.0061   | 1.0367   | 0.0060  |
| 57                  | Provincial capital | 0.9951   | 0.9840   | 1.0063   | 0.3924  |
| 57                  | Non-capital        | 1.0214   | 1.0063   | 1.0368   | 0.0053  |
| 58                  | Provincial capital | 0.9947   | 0.9832   | 1.0063   | 0.3688  |
| 58                  | Non-capital        | 1.0217   | 1.0069   | 1.0367   | 0.0040  |
| 59                  | Provincial capital | 0.9950   | 0.9831   | 1.0070   | 0.4125  |
| 59                  | Non-capital        | 1.0210   | 1.0060   | 1.0362   | 0.0060  |
| 60                  | Provincial capital | 0.9948   | 0.9826   | 1.0073   | 0.4144  |
| 60                  | Non-capital        | 1.0196   | 1.0045   | 1.0349   | 0.0107  |
| 61                  | Provincial capital | 0.9951   | 0.9828   | 1.0076   | 0.4436  |
| 61                  | Non-capital        | 1.0196   | 1.0044   | 1.0351   | 0.0114  |
| 62                  | Provincial capital | 0.9955   | 0.9825   | 1.0087   | 0.5020  |
| 62                  | Non-capital        | 1.0194   | 1.0048   | 1.0342   | 0.0091  |
| 63                  | Provincial capital | 0.9968   | 0.9836   | 1.0102   | 0.6397  |
| 63                  | Non-capital        | 1.0200   | 1.0057   | 1.0344   | 0.0060  |
| 64                  | Provincial capital | 0.9976   | 0.9845   | 1.0108   | 0.7197  |

Continued on next page

Supplementary Table 7 – continued from previous page

| Days after violence | Type of violence   | Estimate | CI lower | CI upper | p-value |
|---------------------|--------------------|----------|----------|----------|---------|
| 64                  | Non-capital        | 1.0208   | 1.0067   | 1.0351   | 0.0037  |
| 65                  | Provincial capital | 0.9978   | 0.9843   | 1.0115   | 0.7553  |
| 65                  | Non-capital        | 1.0215   | 1.0075   | 1.0356   | 0.0025  |
| 66                  | Provincial capital | 0.9986   | 0.9848   | 1.0126   | 0.8422  |
| 66                  | Non-capital        | 1.0219   | 1.0080   | 1.0361   | 0.0020  |
| 67                  | Provincial capital | 0.9969   | 0.9827   | 1.0112   | 0.6666  |
| 67                  | Non-capital        | 1.0223   | 1.0083   | 1.0364   | 0.0017  |
| 68                  | Provincial capital | 0.9961   | 0.9815   | 1.0109   | 0.6056  |
| 68                  | Non-capital        | 1.0211   | 1.0068   | 1.0355   | 0.0036  |
| 69                  | Provincial capital | 0.9965   | 0.9817   | 1.0114   | 0.6415  |
| 69                  | Non-capital        | 1.0204   | 1.0062   | 1.0348   | 0.0047  |
| 70                  | Provincial capital | 0.9972   | 0.9828   | 1.0119   | 0.7102  |
| 70                  | Non-capital        | 1.0167   | 1.0018   | 1.0318   | 0.0279  |
| 71                  | Provincial capital | 0.9975   | 0.9838   | 1.0114   | 0.7232  |
| 71                  | Non-capital        | 1.0168   | 1.0020   | 1.0318   | 0.0255  |
| 72                  | Provincial capital | 0.9975   | 0.9840   | 1.0111   | 0.7168  |
| 72                  | Non-capital        | 1.0163   | 1.0020   | 1.0308   | 0.0255  |
| 73                  | Provincial capital | 0.9975   | 0.9843   | 1.0108   | 0.7094  |
| 73                  | Non-capital        | 1.0160   | 1.0019   | 1.0302   | 0.0262  |
| 74                  | Provincial capital | 0.9987   | 0.9857   | 1.0120   | 0.8517  |
| 74                  | Non-capital        | 1.0154   | 1.0015   | 1.0295   | 0.0294  |
| 75                  | Provincial capital | 0.9984   | 0.9850   | 1.0120   | 0.8190  |
| 75                  | Non-capital        | 1.0167   | 1.0031   | 1.0305   | 0.0161  |
| 76                  | Provincial capital | 0.9986   | 0.9849   | 1.0124   | 0.8377  |
| 76                  | Non-capital        | 1.0163   | 1.0029   | 1.0299   | 0.0173  |
| 77                  | Provincial capital | 0.9996   | 0.9855   | 1.0138   | 0.9510  |
| 77                  | Non-capital        | 1.0161   | 1.0029   | 1.0294   | 0.0168  |
| 78                  | Provincial capital | 0.9997   | 0.9853   | 1.0144   | 0.9707  |
| 78                  | Non-capital        | 1.0172   | 1.0037   | 1.0308   | 0.0124  |
| 79                  | Provincial capital | 1.0003   | 0.9858   | 1.0150   | 0.9663  |
| 79                  | Non-capital        | 1.0178   | 1.0045   | 1.0312   | 0.0085  |
| 80                  | Provincial capital | 1.0014   | 0.9866   | 1.0163   | 0.8563  |

Continued on next page

Supplementary Table 7 – continued from previous page

| Days after violence | Type of violence   | Estimate | CI lower | CI upper | p-value |
|---------------------|--------------------|----------|----------|----------|---------|
| 80                  | Non-capital        | 1.0200   | 1.0072   | 1.0329   | 0.0021  |
| 81                  | Provincial capital | 1.0003   | 0.9855   | 1.0153   | 0.9659  |
| 81                  | Non-capital        | 1.0206   | 1.0077   | 1.0337   | 0.0017  |
| 82                  | Provincial capital | 1.0001   | 0.9849   | 1.0156   | 0.9867  |
| 82                  | Non-capital        | 1.0227   | 1.0099   | 1.0357   | 0.0005  |
| 83                  | Provincial capital | 0.9995   | 0.9842   | 1.0150   | 0.9469  |
| 83                  | Non-capital        | 1.0235   | 1.0103   | 1.0368   | 0.0005  |
| 84                  | Provincial capital | 0.9990   | 0.9843   | 1.0138   | 0.8892  |
| 84                  | Non-capital        | 1.0243   | 1.0112   | 1.0376   | 0.0003  |
| 85                  | Provincial capital | 0.9994   | 0.9850   | 1.0139   | 0.9321  |
| 85                  | Non-capital        | 1.0262   | 1.0127   | 1.0399   | 0.0001  |
| 86                  | Provincial capital | 0.9992   | 0.9853   | 1.0132   | 0.9068  |
| 86                  | Non-capital        | 1.0260   | 1.0125   | 1.0397   | 0.0002  |
| 87                  | Provincial capital | 0.9991   | 0.9857   | 1.0126   | 0.8942  |
| 87                  | Non-capital        | 1.0247   | 1.0114   | 1.0382   | 0.0002  |
| 88                  | Provincial capital | 0.9991   | 0.9860   | 1.0123   | 0.8910  |
| 88                  | Non-capital        | 1.0260   | 1.0131   | 1.0389   | 0.0001  |
| 89                  | Provincial capital | 0.9988   | 0.9859   | 1.0119   | 0.8615  |
| 89                  | Non-capital        | 1.0254   | 1.0124   | 1.0385   | 0.0001  |
| 90                  | Provincial capital | 0.9997   | 0.9875   | 1.0120   | 0.9570  |
| 90                  | Non-capital        | 1.0251   | 1.0122   | 1.0382   | 0.0001  |
| 91                  | Provincial capital | 0.9999   | 0.9877   | 1.0122   | 0.9817  |
| 91                  | Non-capital        | 1.0238   | 1.0106   | 1.0372   | 0.0004  |
| 92                  | Provincial capital | 1.0003   | 0.9886   | 1.0122   | 0.9550  |
| 92                  | Non-capital        | 1.0239   | 1.0108   | 1.0372   | 0.0003  |
| 93                  | Provincial capital | 1.0003   | 0.9886   | 1.0120   | 0.9647  |
| 93                  | Non-capital        | 1.0228   | 1.0097   | 1.0361   | 0.0006  |
| 94                  | Provincial capital | 1.0007   | 0.9891   | 1.0124   | 0.9092  |
| 94                  | Non-capital        | 1.0240   | 1.0107   | 1.0374   | 0.0004  |
| 95                  | Provincial capital | 1.0010   | 0.9897   | 1.0125   | 0.8602  |
| 95                  | Non-capital        | 1.0229   | 1.0096   | 1.0365   | 0.0007  |
| 96                  | Provincial capital | 1.0018   | 0.9902   | 1.0135   | 0.7665  |

Continued on next page

Supplementary Table 7 – continued from previous page

| Days after violence | Type of violence   | Estimate | CI lower | CI upper | p-value |
|---------------------|--------------------|----------|----------|----------|---------|
| 96                  | Non-capital        | 1.0230   | 1.0095   | 1.0367   | 0.0008  |
| 97                  | Provincial capital | 1.0023   | 0.9913   | 1.0135   | 0.6802  |
| 97                  | Non-capital        | 1.0247   | 1.0110   | 1.0386   | 0.0004  |
| 98                  | Provincial capital | 1.0025   | 0.9921   | 1.0130   | 0.6382  |
| 98                  | Non-capital        | 1.0229   | 1.0087   | 1.0374   | 0.0015  |
| 99                  | Provincial capital | 1.0024   | 0.9923   | 1.0126   | 0.6453  |
| 99                  | Non-capital        | 1.0230   | 1.0087   | 1.0375   | 0.0016  |
| 100                 | Provincial capital | 1.0034   | 0.9939   | 1.0130   | 0.4872  |
| 100                 | Non-capital        | 1.0234   | 1.0088   | 1.0381   | 0.0016  |
| 101                 | Provincial capital | 1.0044   | 0.9954   | 1.0135   | 0.3412  |
| 101                 | Non-capital        | 1.0240   | 1.0093   | 1.0389   | 0.0013  |
| 102                 | Provincial capital | 1.0043   | 0.9951   | 1.0136   | 0.3607  |
| 102                 | Non-capital        | 1.0228   | 1.0079   | 1.0378   | 0.0025  |
| 103                 | Provincial capital | 1.0044   | 0.9952   | 1.0137   | 0.3512  |
| 103                 | Non-capital        | 1.0225   | 1.0075   | 1.0378   | 0.0032  |
| 104                 | Provincial capital | 1.0047   | 0.9955   | 1.0140   | 0.3196  |
| 104                 | Non-capital        | 1.0221   | 1.0071   | 1.0373   | 0.0038  |
| 105                 | Provincial capital | 1.0047   | 0.9952   | 1.0142   | 0.3320  |
| 105                 | Non-capital        | 1.0226   | 1.0075   | 1.0379   | 0.0032  |
| 106                 | Provincial capital | 1.0057   | 0.9962   | 1.0153   | 0.2419  |
| 106                 | Non-capital        | 1.0223   | 1.0071   | 1.0379   | 0.0040  |
| 107                 | Provincial capital | 1.0054   | 0.9961   | 1.0149   | 0.2551  |
| 107                 | Non-capital        | 1.0220   | 1.0067   | 1.0376   | 0.0047  |
| 108                 | Provincial capital | 1.0053   | 0.9958   | 1.0149   | 0.2793  |
| 108                 | Non-capital        | 1.0210   | 1.0061   | 1.0362   | 0.0057  |
| 109                 | Provincial capital | 1.0058   | 0.9957   | 1.0159   | 0.2592  |
| 109                 | Non-capital        | 1.0208   | 1.0059   | 1.0360   | 0.0062  |
| 110                 | Provincial capital | 1.0061   | 0.9961   | 1.0162   | 0.2343  |
| 110                 | Non-capital        | 1.0232   | 1.0083   | 1.0383   | 0.0022  |
| 111                 | Provincial capital | 1.0064   | 0.9964   | 1.0165   | 0.2129  |
| 111                 | Non-capital        | 1.0243   | 1.0093   | 1.0395   | 0.0014  |
| 112                 | Provincial capital | 1.0069   | 0.9965   | 1.0174   | 0.1971  |

Continued on next page



Supplementary Table 7 – continued from previous page

| Days after violence | Type of violence   | Estimate | CI lower | CI upper | p-value |
|---------------------|--------------------|----------|----------|----------|---------|
| 112                 | Non-capital        | 1.0215   | 1.0065   | 1.0368   | 0.0048  |
| 113                 | Provincial capital | 1.0072   | 0.9962   | 1.0183   | 0.2023  |
| 113                 | Non-capital        | 1.0205   | 1.0055   | 1.0358   | 0.0072  |
| 114                 | Provincial capital | 1.0077   | 0.9964   | 1.0192   | 0.1831  |
| 114                 | Non-capital        | 1.0196   | 1.0043   | 1.0352   | 0.0120  |
| 115                 | Provincial capital | 1.0074   | 0.9959   | 1.0190   | 0.2064  |
| 115                 | Non-capital        | 1.0194   | 1.0036   | 1.0353   | 0.0156  |
| 116                 | Provincial capital | 1.0071   | 0.9960   | 1.0184   | 0.2117  |
| 116                 | Non-capital        | 1.0196   | 1.0039   | 1.0356   | 0.0142  |
| 117                 | Provincial capital | 1.0077   | 0.9963   | 1.0191   | 0.1859  |
| 117                 | Non-capital        | 1.0181   | 1.0030   | 1.0334   | 0.0187  |
| 118                 | Provincial capital | 1.0079   | 0.9964   | 1.0196   | 0.1809  |
| 118                 | Non-capital        | 1.0167   | 1.0017   | 1.0319   | 0.0290  |
| 119                 | Provincial capital | 1.0073   | 0.9957   | 1.0190   | 0.2205  |
| 119                 | Non-capital        | 1.0158   | 1.0009   | 1.0310   | 0.0378  |
| 120                 | Provincial capital | 1.0078   | 0.9961   | 1.0196   | 0.1911  |
| 120                 | Non-capital        | 1.0173   | 1.0023   | 1.0325   | 0.0232  |

Supplementary Table 8: Full model results for Figure 4.

| Variable           | Days since violence | Estimate | CI lower | CI upper | p-value |
|--------------------|---------------------|----------|----------|----------|---------|
| IS                 | 1-15                | 1.2730   | 1.0828   | 1.4965   | 0.0035  |
| IS                 | 16-30               | 1.2364   | 1.0765   | 1.4201   | 0.0027  |
| IS                 | 31-45               | 1.2820   | 1.1164   | 1.4721   | 0.0004  |
| IS                 | 46-60               | 1.3379   | 1.1248   | 1.5913   | 0.0010  |
| IS                 | 61-75               | 1.3194   | 1.1232   | 1.5498   | 0.0007  |
| IS                 | 76-90               | 1.2511   | 1.0615   | 1.4745   | 0.0075  |
| High casualty      | 1-15                | 1.0242   | 0.9713   | 1.0799   | 0.3768  |
| High casualty      | 16-30               | 1.0071   | 0.9670   | 1.0489   | 0.7329  |
| High casualty      | 31-45               | 1.0041   | 0.9495   | 1.0618   | 0.8869  |
| High casualty      | 46-60               | 1.0314   | 0.9747   | 1.0915   | 0.2837  |
| High casualty      | 61-75               | 0.9909   | 0.9492   | 1.0345   | 0.6780  |
| High casualty      | 76-90               | 0.9963   | 0.9236   | 1.0746   | 0.9227  |
| Long peacetime     | 1-15                | 0.9537   | 0.9239   | 0.9845   | 0.0035  |
| Long peacetime     | 16-30               | 0.9583   | 0.9291   | 0.9885   | 0.0071  |
| Long peacetime     | 31-45               | 0.9489   | 0.9190   | 0.9797   | 0.0013  |
| Long peacetime     | 46-60               | 0.9519   | 0.9234   | 0.9813   | 0.0015  |
| Long peacetime     | 61-75               | 0.9741   | 0.9456   | 1.0034   | 0.0827  |
| Long peacetime     | 76-90               | 0.9856   | 0.9572   | 1.0148   | 0.3306  |
| Provincial capital | 1-15                | 0.9924   | 0.9616   | 1.0242   | 0.6369  |
| Provincial capital | 16-30               | 0.9788   | 0.9469   | 1.0119   | 0.2063  |
| Provincial capital | 31-45               | 0.9863   | 0.9500   | 1.0240   | 0.4716  |
| Provincial capital | 46-60               | 0.9837   | 0.9403   | 1.0293   | 0.4775  |
| Provincial capital | 61-75               | 0.9940   | 0.9604   | 1.0288   | 0.7334  |
| Provincial capital | 76-90               | 0.9969   | 0.9636   | 1.0314   | 0.8585  |
| Population (log)   | 1-15                | 1.0053   | 0.9865   | 1.0245   | 0.5832  |
| Population (log)   | 16-30               | 0.9969   | 0.9804   | 1.0137   | 0.7157  |
| Population (log)   | 31-45               | 0.9879   | 0.9690   | 1.0073   | 0.2203  |
| Population (log)   | 46-60               | 0.9951   | 0.9752   | 1.0155   | 0.6368  |
| Population (log)   | 61-75               | 1.0042   | 0.9857   | 1.0230   | 0.6570  |
| Population (log)   | 76-90               | 1.0073   | 0.9901   | 1.0248   | 0.4070  |

Supplementary Table 9: Full model results for Figure 6.

| Origin district | Destination district               | Days after violence | Estimate | CI lower | CI upper | p-value |
|-----------------|------------------------------------|---------------------|----------|----------|----------|---------|
| Non-capitals    | Same province: Non-capital         | 7                   | 1.0112   | 0.9808   | 1.0426   | 0.4732  |
| Non-capitals    | Same province: Non-capital         | 30                  | 1.0078   | 0.9847   | 1.0314   | 0.5128  |
| Non-capitals    | Same province: Non-capital         | 90                  | 1.0030   | 0.9842   | 1.0223   | 0.7539  |
| Non-capitals    | Same province: Capital             | 7                   | 1.0262   | 0.9979   | 1.0554   | 0.0703  |
| Non-capitals    | Same province: Capital             | 30                  | 1.0324   | 1.0142   | 1.0510   | 0.0005  |
| Non-capitals    | Same province: Capital             | 90                  | 1.0229   | 1.0050   | 1.0410   | 0.0118  |
| Non-capitals    | Different province: Top-5 cities   | 7                   | 0.9610   | 0.9367   | 0.9858   | 0.0023  |
| Non-capitals    | Different province: Top-5 cities   | 30                  | 0.9730   | 0.9554   | 0.9909   | 0.0033  |
| Non-capitals    | Different province: Top-5 cities   | 90                  | 0.9718   | 0.9577   | 0.9860   | 0.0001  |
| Non-capitals    | Different province: Other capitals | 7                   | 0.9848   | 0.9596   | 1.0106   | 0.2445  |
| Non-capitals    | Different province: Other capitals | 30                  | 0.9871   | 0.9677   | 1.0069   | 0.2002  |
| Non-capitals    | Different province: Other capitals | 90                  | 0.9969   | 0.9806   | 1.0135   | 0.7148  |
| Non-capitals    | Different province: Non-capital    | 7                   | 0.9804   | 0.9530   | 1.0085   | 0.1697  |
| Non-capitals    | Different province: Non-capital    | 30                  | 0.9855   | 0.9690   | 1.0022   | 0.0889  |
| Non-capitals    | Different province: Non-capital    | 90                  | 0.9966   | 0.9827   | 1.0106   | 0.6276  |
| Capitals        | Same province: Non-capital         | 7                   | 0.9756   | 0.9485   | 1.0034   | 0.0849  |
| Capitals        | Same province: Non-capital         | 30                  | 0.9819   | 0.9635   | 1.0007   | 0.0590  |
| Capitals        | Same province: Non-capital         | 90                  | 0.9967   | 0.9820   | 1.0115   | 0.6592  |
| Capitals        | Different province: Top-5 cities   | 7                   | 1.0100   | 0.9943   | 1.0260   | 0.2129  |
| Capitals        | Different province: Top-5 cities   | 30                  | 1.0063   | 0.9939   | 1.0190   | 0.3215  |
| Capitals        | Different province: Top-5 cities   | 90                  | 1.0000   | 0.9847   | 1.0154   | 0.9980  |
| Capitals        | Different province: Other capitals | 7                   | 0.9945   | 0.9759   | 1.0135   | 0.5676  |
| Capitals        | Different province: Other capitals | 30                  | 1.0011   | 0.9878   | 1.0145   | 0.8763  |
| Capitals        | Different province: Other capitals | 90                  | 1.0051   | 0.9864   | 1.0242   | 0.5947  |
| Capitals        | Different province: Non-capital    | 7                   | 1.0063   | 0.9837   | 1.0293   | 0.5877  |
| Capitals        | Different province: Non-capital    | 30                  | 1.0094   | 0.9985   | 1.0205   | 0.0916  |
| Capitals        | Different province: Non-capital    | 90                  | 1.0039   | 0.9886   | 1.0195   | 0.6159  |
